# Supplementary material
Source: PubMed Central journal article supplement (PMC9448746)
Supplement: 41421_2022_450_MOESM1_ESM.pdf [file 41421_2022_450_MOESM1_ESM.pdf]

---

## Supplementary Materials for

### **RNA G-quadruplex formed in SARS-CoV-2 used for COVID-19 treatment in animal models**

#### **Authors**

Geng Qin,<sup>1,2†</sup> Chuanqi Zhao,<sup>1,2†</sup> Yan Liu,<sup>3†</sup> Cheng Zhang,<sup>3,4†</sup> Guang Yang,<sup>3</sup> Jie Yang,<sup>1,2</sup> Zhao Wang,<sup>1,2</sup> Chunyu Wang,<sup>5</sup> Changchun Tu,<sup>3</sup> Zhendong Guo,<sup>3</sup> Jinsong Ren,<sup>1,2</sup> and Xiaogang Qu<sup>\*,1,2</sup>

#### **Affiliations**

<sup>1</sup>Laboratory of Chemical Biology and State Key Laboratory of Rare Earth Resource Utilization, Changchun Institute of Applied Chemistry, Chinese Academy of Sciences, Changchun, Jilin, China

<sup>2</sup>University of Science and Technology of China, Hefei, Anhui, China

<sup>3</sup>Changchun Veterinary Research Institute, Chinese Academy of Agricultural Sciences, Changchun, Jilin, China

<sup>4</sup>Hebei Agricultural University, College of Veterinary Medicine, 2596 Lucky South Street, Baoding, Hebei, China

<sup>5</sup>State Key Laboratory of Supramolecular Structure and Materials, Jilin University, Changchun, Jilin, China

†These authors contributed equally to this work

\*Corresponding author: Xiaogang Qu.

Email: [xqu@ciac.ac.cn](mailto:xqu@ciac.ac.cn)

#### **This PDF file includes:**

Supplementary information text

Supplementary materials and methods

Supplementary Tables S1 to S3

Supplementary Figs. S1 to S23

## Supporting information text

**Table S1.** Characteristics of the 18 putative G-quadruplexes.

**Table S2.** The stability and thermodynamic parameters of 14 putative G-quadruplexes.

**Table S3.** Oligonucleotides and primers in this study.

**Fig. S1.** Identification and selection of G-quadruplexes (G4s) in SARS-CoV-2 genome.

**Fig. S2.** Screening the PQSs in SARS-CoV-2 genome by fluorescence turn-on assays.

**Fig. S3.** The structure and stability of PQS candidates.

**Fig. S4.** The analysis of the conservation of PQS candidates.

**Fig. S5.** Visualization of the PQSs in six human coronaviruses.

**Fig. S6.** The number of PQSs in seven human coronaviruses.

**Fig. S7.** The formation of P4 G4 in vitro.

**Fig. S8.** Chemical structures of TMPyP2.

**Fig. S9.** The formation of P4 G4 inhibits the protein expression.

**Fig. S10.** TMPyP2 treatment does not inhibit the RNA translation and replication.

**Fig. S11.** TMPyP4 treatment suppresses the RNA translation and replication by targeting the other G4s in SARS-CoV-2.

**Fig. S12.** The cytotoxicity and antiviral activity of TMPyP4 and TMPyP2 treatment in Vero E6 cells.

**Fig. S13.** The cytotoxicity and antiviral activity of TMPyP4 in Calu-3 cells.

**Fig. S14.** TMPyP4 did not exhibit antiviral synergy with remdesivir.

**Fig. S15.** ASO suppresses the effect of TMPyP4 on P4-EGFP SARS-CoV-2 lentivirus infection.

**Fig. S16.** Therapeutic treatment of TMPyP4 inhibits viral replication in Vero E6 cells.

**Fig. S17.** Primary pharmacokinetic (PK) evaluation of TMPyP4 in hamsters.

**Fig. S18.** Intranasal administration of TMPyP4 (30 mg/kg) once daily for 7 consecutive days show no noticeable toxicity in the lung tissues of hamsters.

**Fig. S19.** Intranasal administration of TMPyP4 (30 mg/kg) once daily for 7 consecutive days show no noticeable toxicity in the liver and kidney tissues of hamsters.

**Fig. S20.** Scanning images of whole lung tissue sections.

**Fig. S21.** Antiviral activity of TMPyP4 in the hamster pre-infected with SARS-CoV-2.

**Fig. S22.** Antiviral activity of TMPyP4 in hACE2 transgenic mouse model of SARS-CoV-2 infection.

**Fig. S23.** The regulatory mechanism of G4s in SARS-CoV-2 life cycle.

## Supplementary materials and methods

### Bioinformatics analysis

The complete genome sequences of 7 known human coronavirus (HCoV-229E, HCoV-OC43, HCoV-NL63, HCoV-HKU1, SARS-CoV-1, MERS-CoV and SARS-CoV-2) were retrieved from the NCBI Genome database (<https://www.ncbi.nlm.nih.gov/genomes>). The FASTA sequences of the SARS-CoV-2 genomes were then used for the prediction of the putative G4-forming sequences (PQSs) with ImGQfinder<sup>1</sup>, Pqsfinder<sup>2</sup>, QGRS-mapper<sup>3</sup> and G4Catchall<sup>4</sup>. The search was based on the following algorithm:

$$G_{\geq 2}N_{1-15}G_{\geq 2}N_{1-15}G_{\geq 2}N_{1-15}G_{\geq 2}$$

where G corresponds to guanine and N corresponds to any base including guanine. Though the SARS-CoV-2 is a positive-sense RNA virus, we also sought to find the PQSs in the negative-sense strand of the viral genome. The ImGQfinder (<http://imgqfinder.niifhm.ru/>), Pqsfinder (<https://pqsfinder.fi.muni.cz/>), QGRS-mapper (<https://bioinformatics.ramapo.edu/QGRS/analyze.php>) and G4CatchALL (<http://homes.ieu.edu.tr/odoluca/G4Catchall/>) were run using their online tools.

For evaluating the G4 folding capabilities by the consecutive G over consecutive C ratio (cGcC), G4Hunter (G4H) and G4 neural network (G4NN) scores, the G4RNA screener ([http://scottgroup.med.usherbrooke.ca/G4RNA\\_screener/](http://scottgroup.med.usherbrooke.ca/G4RNA_screener/)) were used<sup>5</sup>.

cGcC was implemented to address the issue of competition in between G4 and Watson-Crick based structures. The presence of cytosine runs in the vicinity of a potential G4 was demonstrated to be an important feature to consider in the identification of potential G4 since the base pairing of those C runs with G runs involved in the potential G4 can hinder its formation. This score varies on a logarithmic scale by its ratio nature<sup>6</sup>. In this study, PQSs with a ratio value superior to the arbitrary threshold of 4.5 were considered as being accessible under conditions favouring G4 folding.

G4H was designed in a similar way to the cGcC score but was built to analyze DNA sequences. We demonstrated its relevance in RNA as well. It attributes an

increasing positive score to each contiguous G and a negative counterpart for contiguous C. The sequence is then scored by the average of the values<sup>7</sup>. In this study, PQSs with a ratio value superior to the arbitrary threshold of 0.9 were considered as being accessible under conditions favouring G4 folding.

Sequences of the G4RNA database were converted into vectors of their trinucleotide content to train an artificial neural network. This artificial neural network, G4NN, evaluates the similarity of a given sequence to known G-quadruplexes and reports it as a score between 0 and 1<sup>8</sup>. In this study, PQSs with a ratio value superior to the arbitrary threshold of 0.5 were considered as being accessible under conditions favouring G4 folding.

For the analysis of the conservation of the 7 PQS sites across strains, 3969 complete genomic sequences of SARS-CoV-2 genome were retrieved from the University of California Santa Cruz (UCSC) genome browser, and the graphical representation of the aligned sequences was generated using the WebLogo 3 software program (<http://weblogo.threeplusone.com/>)<sup>9</sup>.

For the analysis of the conservation of the 7 PQS sites throughout the human coronavirus family, 7 known human coronavirus genomic sequences were retrieved from the University of California Santa Cruz (UCSC) genome browser, and the graphical representation of the aligned sequences was generated using the WebLogo 3 software program.

### **Thermodynamic parameters obtained by melting analysis**

In order to calculate thermodynamic parameters, including the enthalpy change ( $\Delta H^{\circ}$ ), the entropy change ( $\Delta S^{\circ}$ ), and the free energy change ( $\Delta G^{\circ}$ ) for intramolecular G4 formation, the melting curves were fit to the theoretical equation.  $\Delta H^{\circ}$  was the slope of the  $\ln Ka$  versus  $1/T$  plot according to the equation  $\ln Ka = -(\Delta H^{\circ})/RT + \Delta S^{\circ}/R$ , where  $\Delta S^{\circ}$  was the entropy change that was calculated according to the y axis intercept. The free energy change ( $\Delta G^{\circ}_{25}$ ) was calculated from the standard Gibbs's equation,  $\Delta G^{\circ}_{25} = \Delta H^{\circ} - T\Delta S^{\circ}$ .

### **Stopped-flow experiments**

Fluorescence stopped-flow experiments were carried out by using an SX20

Stopped-Flow Spectrometer. In these assays, NMM treated samples (NMM/F-P4-WT or NMM/F-P4-Mut in 10 mM Tris-HCl buffer, 0 mM KCl, pH = 7.2) were mixed with K<sup>+</sup>-containing buffer (10 mM Tris-HCl buffer, 200 mM KCl, pH = 7.2). Fluorescence changes were monitored at a wavelength of 661 nm with an excitation wavelength of 395 nm.

### **Simultaneous fluorescence in situ hybridization (FISH) and immunofluorescence.**

One set of Stellaris FISH probes, targeting SARS-CoV-2 RNA were obtained from Shanghai Sangon Biological Engineering Technology & Services (Shanghai, China). Cells grown on chambered dishes were fixed with 4% paraformaldehyde overnight in the ABSL3 laboratory. Cells were then permeabilized with 70% ethanol for at least 2 h and subjected to FISH and immunofluorescence. Briefly, cells were incubated with BG4 specific antibody (1:400) and viral RNA FISH probes (1:1000) in Hybridization Buffer consisting of 20 µg/mL fish sperm DNA (fsDNA), 50 µg/mL heparin, 50% Deionized formamide, 0.1% SDS, 5 × Denhardt's and 5 × SSC (PH = 7.0) for at least 4 h at 37 °C. Slides were then washed three times and then incubated with secondary antibodies for 1 h at 37 °C. Finally, slides were washed three times and incubated with DAPI for 2 min to stain nuclear DNA in the dark before taken images with confocal laser-scanning microscope. The probes were described in **Table S3**.

### **Vectors construction and transfection**

A reporter vector with the pLV-EGFP-N backbone (Inovogen Tech. Co., Beijing, China) was generated to encode the SARS-CoV-2 genome sequences with P1, P2, P3 and P6 G4 sites. The SARS-CoV-2 genome sequences (nucleotides 3,344-3,643) with P4 G4 site were PCR-amplified and subcloned into pCAG-Flag vector and pLV-EGFP-N backbone (Inovogen Tech. Co., Beijing, China). And the pCAG-Flag is a generous gift from Prof. Peihui Wang (Cheeloo College of Medicine, Shandong University, Jinan). By using the Stratagene QuikChange Site-Directed Mutagenesis kit, we point mutated the P4 G4 site.

For viral packaging and infection were performed as previously described<sup>10</sup>. Briefly, the pLV-EGFP-N along with viral packaging plasmids (PMD and SPA) were

transfected into human embryonic kidney 293T cells using Lipofectamine 2000 (Invitrogen, USA), following the manufacturer's instructions. Virus supernatant was harvested after 48 hr, filtered through a 0.45  $\mu$ M filter, and incubated on target cells for 6 hr at a 1:10 dilution with 8  $\mu$ g/mL polybrene. For transfection, the cells were transfected with the indicated vectors using Lipofectamine 2000 (Invitrogen, CA, USA) following the manufacturer's protocol. The transfected cells were harvested after 48 to 72 h.

### **Western blotting assays**

For protein analysis of whole-cell lysates, cells were lysed in RIPA (CW BIO, Beijing, China) buffer. Total proteins (10 - 20  $\mu$ g) were re-suspended in Laemmli buffer (63 mM Tris-HCl, 10% glycerol, 2% SDS, 0.0025% bromophenolblue, pH 6.8) and electrophoresed on SDS-polyacrylamide gels. Then, proteins were transferred to polyvinylidene difluoride membrane. After an incubation with antibodies specific for nucleocapsid phosphoprotein (40143-R001; Sinobiology, China), GFP (AF1483; Beyotime, Shanghai, China), Flag (bs-0965R; Bioss, Beijing, China) or GAPDH (#CW0098M; CW BIO, Beijing, China), the blots were incubated with anti-mouse (#CW0102M; CW BIO, Beijing, China) or anti-rabbit (#CW0103M; CW BIO, Beijing, China) secondary antibodies conjugated to horseradish peroxidase (HRP). The immunoreactive bands were detected using SuperSignal™ West Pico chemiluminescent substrate kit (Thermo Fisher Scientific, Waltham, MA, USA) and Western blotting detection system (BioRad, Hercules, CA, USA). The GAPDH was used as a loading control for western blotting assays.

### **Quantitative real-time polymerase chain reaction (qRT-PCR) assays**

Total RNAs were extracted from cultured cells or tissues using RNApure tissue&cell kit (CW BIO, China) according to the manufacturer's protocol. The cDNAs were synthesized from 500 ng of total RNAs using PrimeScript RT reagent kit (Takara, Japan) according to the manufacturer's protocol. The qRT-PCR assays were performed using SYBR FAST qPCR kit (Kapa Biosystems, USA) at the BioRad IQ5 real-time PCR system (BioRad, Hercules, CA, USA). The relative expression levels of RNAs were calculated using the comparative  $C_t$  method. Melting curve analyses

were performed on all PCRs to rule out the non-specific amplification. The primers were described in **Table S3**.

### **Cell viability assays**

Cell viability of Vero E6 cells with PDP or TMPyP4 treatment was assessed using SRB assay/sulforhodamine B assay kit (ab235935; Abcam, USA) according to the manufacturer's protocol, and the details were described in our previous study<sup>11</sup>.

### **Evaluation of antiviral activities of TMPyP4 and PDP**

The in vitro antiviral studies were carried out in an animal biosafety level 3 (ABSL3) in Changchun Veterinary Research Institute, Chinese Academy of Agricultural Sciences. To evaluate the antiviral efficacy of TMPyP4 and PDP, Vero E6 cells were cultured overnight in 6-well cell-culture petridish with a density of  $10^6$  cells/well. Cells were pre-treated with the different doses of the indicated antivirals for 1 h, and the virus ( $10^3$  or  $10^2$  TCID<sub>50</sub>) was subsequently added to allow infection for 1 h. Then, the virus-drug mixture was removed and cells were further cultured with fresh drug-containing medium. At 72 h post infection, the cell supernatant and lysates were collected for further quantification analysis. For investigating the antiviral effect of TMPyP4 therapeutic treatment, cells were pre-infected with the virus ( $10^3$  TCID<sub>50</sub>) for 12 or 24 h, and 100  $\mu$ M TMPyP4 was subsequently added.

**Viral infection and viral titer assays** For viral infection, cells were incubated with virus for 1 h at 37 °C at the indicated TCID<sub>50</sub>. Then, the excess virus inoculum was removed by washing three times with PBS. For viral titer assays, cells were seeded in 96-well plates at a density of  $1 \times 10^4$  per well. On the next day, the cells were inoculated with serially diluted viruses ( $10^{-1}$ ~ $10^{-12}$  fold) for 1 h at 37 °C. The excess virus inoculum was removed by washing three times with PBS. Then, 200  $\mu$ l of maintenance medium (DMEM/2% FBS) was added to each well, and the cells were further cultured for 3–5 days. The cells demonstrating the expected cytopathic effect were observed daily, and the TCID<sub>50</sub> value was calculated with the Reed-Muench method.

### **Viral RNA extraction and detection**

Total viral RNA was extracted from Vero E6 cells or the tissues homogenates of nasal



and lung using the RNeasy Mini Kit (Qiagen, Hilden, Germany), and viral RNA loads were determined by a SARS-CoV-2 RNA detection kit (Shenzhen Puruikang Biotech, China). The viral RNA loads for the target SARS-CoV-2 N gene was normalized to the standard curve obtained by using a plasmid containing the full-length cDNA of the SARS-CoV-2 N gene. The reactions were performed with CFX96 system (BIO-RAD, America) according to following protocol: 50 °C for 20 min for reverse transcription, followed by 95 °C for 3 min and then 45 cycles of 95 °C for 5 s, 56 °C for 45 s.

#### **TMPyP4 pharmacokinetic study in Syrian hamsters**

To assess the pharmacokinetic study of TMPyP4 *in vivo*, six-week-old male Syrian hamsters were purchased from Merial Vital Laboratory Animal Technology Company. The pharmacokinetic study was performed as previously described<sup>12, 13</sup> with some modification. Briefly, after a single intranasal (i.n.) administration (30 mg/kg), 3 animals per sampling time point (0.83, 0.25, 0.5, 1, 2, 4, 6, 8, 10 and 24 h post-dosing) blood samples were collected from humanely euthanized mice, and centrifuged to isolate plasma. Subsequently, the plasma compound concentrations of TMPyP4 were determined as previously described<sup>14, 15</sup>. The plasma concentration-time profile was plotted using GraphPad Prism and the pharmacokinetic parameters were calculated using PKsolver 2.0<sup>16</sup>. Non-compartment analysis was performed to estimate pharmacokinetic parameters, including the area under the plasma concentration-time curve ( $AUC_{0-t}$  and  $AUC_{0-inf\_obs}$ ) and apparent terminal half-life ( $T_{1/2}$ ), mean residence time ( $MRT_{0-inf\_obs}$ ), apparent volume of distribution during terminal phase after non-intravenous administration ( $V_z/F_{obs}$ ) and apparent total clearance of the drug from plasma ( $CL/F_{obs}$ ), peak plasma concentration ( $C_{max}$ ), and the time to attain  $C_{max}$  ( $T_{max}$ ).

#### **In vivo toxicity studies of TMPyP4**

To assess the toxicity of TMPyP4 *in vivo*, six-week-old male Syrian hamsters were purchased from Merial Vital Laboratory Animal Technology Company and randomly divided into indicated groups before TMPyP4 or vehicle treatment. TMPyP4 were dissolved in saline. The hamsters were intranasal administration 30 mg/kg TMPyP4 once daily for one week ( $n = 5$ ). All animals were monitored twice a day for at least 7

days for toxic signs, including body weight loss, food intake reduction and abnormal behaviors. At the end of the experiment, samples of liver, lung and kidney were collected. All tissues were fixed with paraformaldehyde (4%) before dehydration and embedding in paraffin. Paraffin sections were applied for hematoxylin and eosin staining (H&E).

### **In vivo antiviral studies of TMPyP4**

The in vivo antiviral studies were carried out in an ABSL3 facility in Changchun Veterinary Research Institute, Chinese Academy of Agricultural Sciences. All animal studies were performed in strict accordance with the guidelines set by the Chinese Regulations of Laboratory Animals and Laboratory Animal-Requirements of Environment and Housing Facilities. All animals used in this study were chosen randomly. We performed two studies to evaluate the in vivo efficacy of TMPyP4 as antiviral in SARS-CoV-2 infection. First, we use a model of Syrian hamsters; and second, we used a model of human angiotensin-converting enzyme 2 (hACE2)-KI/IOZ C57BL/6 mouse.

The six-week-old male hamsters were intranasal (i.n.) administration TMPyP4 ( $n = 10$ ) or saline ( $n = 5$ ) 1 h prior to infection. Then the hamsters were anesthetized and infected intranasally with  $10^5$  TCID<sub>50</sub> of SARS-CoV-2. For the low challenge dose group, 15 mg/kg TMPyP4 was given i.n. once daily ( $n = 5$ ). For the high challenge dose group, 30 mg/kg TMPyP4 was given i.n. once daily ( $n = 5$ ). The conditions of hamsters including body weight were monitored daily until sacrifice. 3 days post infection (dpi), the hamsters were humanely euthanized. The nasal wash, nasal tissues and lung tissues were harvested for viral titration and pathological examination. Briefly, the nasal tissues and lung tissues were weighed, and 1 gram of each tissue was placed into 1 mL of PBS containing 100 U/mL penicillin, making 10% weight/volume homogenates. The tissue samples were homogenized by Tissue Lyser (QIAGEN, Germany) and centrifuged at 8,000 rpm. The supernatants were then collected and inoculated into Vero E6 cells, and viral RNA copy numbers and viral titration were determined by qRT-PCR and TCID<sub>50</sub>, respectively. Meanwhile, the lungs were fixed in formalin, and the fixed tissues were embedded in paraffin and stained with H&E

for pathological examination. For investigating the antiviral effect of TMPyP4 therapeutic treatment in vivo, the hamsters were pre-infected with the virus ( $10^5$  TCID<sub>50</sub>) for 24 h, and then 30 mg/kg TMPyP4 was given i.n. once daily ( $n = 5$ ).

The six-week-old male hamsters were administration saline ( $n = 5$ ), TMPyP4 ( $n = 5$ , i.n., 15 mg/kg), TMPyP2 ( $n = 5$ , i.n., 15 mg/kg), remdesivir ( $n = 5$ , intraperitoneal, i.p., 15 mg/kg) and combination of TMPyP4 ( $n = 5$ , i.n., 15 mg/kg) and remdesivir ( $n = 5$ , intraperitoneal, i.p., 15 mg/kg)) 1 h prior to infection. Then the hamsters were anesthetized and infected intranasally with  $10^5$  TCID<sub>50</sub> of SARS-CoV-2. The conditions of hamsters including body weight were monitored daily until sacrifice. 3 dpi, the hamsters were humanely euthanized. The nasal wash, nasal tissues and lung tissues were harvested for viral titration and pathological examination.

The six-week-old female hACE2-KI/IOZ C57BL/6 mice were purchased from Beijing HFK BIOSCIENCE. Co., Ltd. The mice were i.n. administration TMPyP4 ( $n = 10$ ) or saline ( $n = 5$ ) 1 h prior to infection. Then the mice were anesthetized and infected intranasally with  $10^5$  TCID<sub>50</sub> of SARS-CoV-2. For the low challenge dose group, 15 mg/kg TMPyP4 was given i.n. once daily ( $n = 5$ ). For the high challenge dose group, 30 mg/kg TMPyP4 was given i.n. once daily ( $n = 5$ ). The conditions of mice including body weight were monitored daily until sacrifice. 3 dpi, mice were humanely euthanized. The nasal tissues and lung tissues of mice were harvested and weighed for viral titration, and 0.2 gram of each tissue was placed into 1 mL of PBS for homogenates.

### **Lung histological analysis**

Lung histological analysis was examined by an experienced pathologist. H&E stained sections of lung from hamsters and mice were examined by implementing a semi quantitative, 5 point grading scheme (0-within normal limits, 1-mild, 2-moderate, 3-marked, 4-severe) that took into account four different histopathological parameters: 1) perivascular inflammation 2) bronchial or bronchiolar epithelial degeneration or necrosis 3) bronchial or bronchiolar inflammation and 4) alveolar inflammation.

**Reference**

- 1 Varizhuk A, Ischenko D, Tsvetkov V *et al.* The expanding repertoire of G4 DNA structures. *Biochimie* 2017; **135**:54-62.
- 2 Hon J, Martinek T, Zendulka J, Lexa M. pqsfinder: an exhaustive and imperfection-tolerant search tool for potential quadruplex-forming sequences in R. *Bioinformatics* 2017; **33**:3373-3379.
- 3 Kikin O, D'Antonio L, Bagga PS. QGRS Mapper: a web-based server for predicting G-quadruplexes in nucleotide sequences. *Nucleic acids research* 2006; **34**:W676-682.
- 4 Doluca O. G4Catchall: A G-quadruplex prediction approach considering atypical features. *Journal of theoretical biology* 2019; **463**:92-98.
- 5 Garant JM, Perreault JP, Scott MS. G4RNA screener web server: User focused interface for RNA G-quadruplex prediction. *Biochimie* 2018; **151**:115-118.
- 6 Beaudoin JD, Jodoin R, Perreault JP. New scoring system to identify RNA G-quadruplex folding. *Nucleic acids research* 2014; **42**:1209-1223.
- 7 Bedrat A, Lacroix L, Mergny JL. Re-evaluation of G-quadruplex propensity with G4Hunter. *Nucleic acids research* 2016; **44**:1746-1759.
- 8 Garant JM, Perreault JP, Scott MS. Motif independent identification of potential RNA G-quadruplexes by G4RNA screener. *Bioinformatics* 2017; **33**:3532-3537.
- 9 Crooks GE, Hon G, Chandonia JM, Brenner SE. WebLogo: a sequence logo generator. *Genome research* 2004; **14**:1188-1190.
- 10 Qin G, Tu X, Li H *et al.* Long Noncoding RNA p53-Stabilizing and Activating RNA Promotes p53 Signaling by Inhibiting Heterogeneous Nuclear Ribonucleoprotein K deSUMOylation and Suppresses Hepatocellular Carcinoma. *Hepatology* 2020; **71**:112-129.
- 11 Luo Q, Zhang L, Wei F *et al.* mTORC1 Negatively Regulates the Replication of Classical Swine Fever Virus Through Autophagy and IRES-Dependent Translation. *iScience* 2018; **3**:87-101.
- 12 White KM, Rosales R, Yildiz S *et al.* Plitidepsin has potent preclinical efficacy against SARS-CoV-2 by targeting the host protein eEF1A. *Science* 2021; **371**:926-931.
- 13 Qiao J, Li YS, Zeng R *et al.* SARS-CoV-2 M(pro) inhibitors with antiviral activity in a transgenic mouse model. *Science* 2021; **371**:1374-1378.
- 14 Shioda N, Yabuki Y, Yamaguchi K *et al.* Targeting G-quadruplex DNA as cognitive function therapy for ATR-X syndrome. *Nature medicine* 2018; **24**:802-813.
- 15 Rapozzi V, Zorzet S, Zacchigna M, Della Pietra E, Cogoi S, Xodo LE. Anticancer activity of cationic porphyrins in melanoma tumour-bearing mice and mechanistic in vitro studies. *Molecular cancer* 2014; **13**:75.
- 16 Zhang Y, Huo M, Zhou J, Xie S. PKSolver: An add-in program for pharmacokinetic and pharmacodynamic data analysis in Microsoft Excel. *Computer methods and programs in biomedicine* 2010; **99**:306-314.

**Table S1. Characteristics of the 18 putative G-quadruplexes**

| Putative G-quadruplexes | Positions <sup>a</sup> | Genes        | Sequences                                  | eGcC <sup>b</sup> | G4H <sup>c</sup> | G4NN <sup>d</sup> |
|-------------------------|------------------------|--------------|--------------------------------------------|-------------------|------------------|-------------------|
| P1                      | 353-377                | ORF1ab-nsp1  | <u>GGCUUUGGAGACUCCGU</u> <u>GGAGGAGG</u>   | 3.6667            | 0.64             | 0.0214            |
| P2                      | 644-663                | ORF1ab-nsp1  | <u>GGUAAUAAAGGAGCU</u> <u>GGUGG</u>        | <b>17</b>         | 0.8              | <b>0.7006</b>     |
| P3                      | 1,574-1,599            | ORF1ab-nsp2  | <u>GGUGUUGUUGGAGAAGG</u> <u>UUCCGAAGG</u>  | <b>5</b>          | 0.6154           | 0.2025            |
| P4                      | 3,467-3,483            | ORF1ab-nsp3  | <u>GGAGGAGGUGUUGCAGG</u>                   | <b>18</b>         | <b>1</b>         | <b>0.8704</b>     |
| P5                      | 8,687-8,709            | ORF1ab-nsp4  | <u>GGAUACAAGGC</u> <u>UAUUGAUGGUGG</u>     | <b>8.5</b>        | 0.6522           | 0.1148            |
| P6                      | 13,385-13,404          | ORF1ab-nsp10 | <u>GGUAUGUGGAAAGG</u> <u>UUAUGG</u>        | <b>170</b>        | 0.85             | 0.022             |
| P7                      | 24,215-24,234          | S            | <u>GGUUGGACCUUUGGUGCAGG</u>                | 3.4               | 0.6              | 0.1581            |
| P8                      | 24,268-24,291          | S            | <u>GGCUUAUAGGUUUAAUGG</u> <u>UAUUGG</u>    | <b>16</b>         | 0.625            | 0.0053            |
| P9                      | 25,197-25,218          | S            | <u>GGCCAUGGUACA</u> <u>UUUGGCUAGG</u>      | 2.6667            | 0.4545           | 0.0244            |
| P10                     | 28,903-28,917          | N            | <u>GGCUGGCAAUGGCGG</u>                     | <b>5.3333</b>     | 0.8667           | <b>0.568</b>      |
| P11                     | 14-37                  | -            | <u>GGUUGGUUUUGUUACCU</u> <u>GGGAAGG</u>    | <b>5.75</b>       | 0.7826           | <b>0.5672</b>     |
| P12                     | 4,886-4,901            | -            | <u>GGUGGAAUGUGGUAGG</u>                    | <b>170</b>        | <b>1.0625</b>    | <b>0.8456</b>     |
| P13                     | 6,011-6,027            | -            | <u>GGUAUAGGUUGGUUUGG</u>                   | <b>160</b>        | <b>0.9412</b>    | 0.0217            |
| P14                     | 10,015-10,030          | -            | <u>GGUGAUAGAGGUUUUGU</u> <u>GGUGGUUGG</u>  | <b>230</b>        | <b>0.92</b>      | 0.2852            |
| P15                     | 13,254-13,281          | -            | <u>GGAUUUUGGAUGAUC</u> <u>AUGUGGCAACGG</u> | <b>6</b>          | 0.5556           | 0.0337            |
| P16                     | 15,924-15,941          | -            | <u>GGaucuGGGUAAGGAAGG</u>                  | <b>22</b>         | <b>1.1111</b>    | <b>0.9722</b>     |
| P17                     | 16,750-16,768          | -            | <u>GGUUAAGTGGUGGUCUAGG</u>                 | <b>17</b>         | 0.8421           | <b>0.7926</b>     |

|     |               |   |                              |     |        |        |
|-----|---------------|---|------------------------------|-----|--------|--------|
| P18 | 29,718-29,739 | - | <b>GGCCUCGGUGAAAUGUGGUGG</b> | 3.6 | 0.5909 | 0.2217 |
|-----|---------------|---|------------------------------|-----|--------|--------|

<sup>a</sup>Positions are based on SARS-CoV-2 Jan. 2020/NC\_045512.2 Assembly (wuhCor1). <sup>b</sup>cGcC was implemented to address the issue of competition in between G4 and Watson-Crick based structures, and the threshold is 4.5. <sup>c</sup>G4H attributes an increasing positive score to each contiguous G and a negative counterpart for contiguous C, the sequence is then scored by the average of the values. The threshold is 0.9. <sup>d</sup>This artificial neural network, G4NN, evaluates the similarity of a given sequence to known G-quadruplexes and reports it as a score between 0 and 1. The threshold is 0.5. cGcC, the consecutive G over consecutive C ratio; G4H, G4Hunter; G4NN, G4 neural network; N, nucleocapsid protein; nsp, non-structural protein; ORF, open reading frame; S, spike glycoprotein; -, putative G-quadruplexes locate in negative-sense strands of SARS-CoV-2; Boldface type indicates that the scores of putative G-quadruplexes are above the threshold.

**Table S2. The stability and thermodynamic parameters of 14 putative G-quadruplexes**

| Putative G-quadruplexes | G4-formation | $T_M$ | $\Delta G_{25}^\circ$ (kcal/mol) | $\Delta H^\circ$ (kcal/mol) | $T\Delta S^\circ$ (kcal/mol) |
|-------------------------|--------------|-------|----------------------------------|-----------------------------|------------------------------|
| P2                      | Yes          | 45    | $-1.8 \pm 0.07$                  | $-19.8 \pm 0.9$             | $-18.0 \pm 0.8$              |
| P3                      | Yes          | 50    | $-2.1 \pm 0.1$                   | $-20.5 \pm 1.3$             | $-18.46 \pm 1.1$             |
| P4                      | Yes          | 63.2  | $-3.1 \pm 0.20$                  | $-28.0 \pm 1.3$             | $-24.9 \pm 1.2$              |
| P5                      | No           | -     | -                                | -                           | -                            |
| P6                      | Yes          | 41.2  | $-1.9 \pm 0.08$                  | $-20.2 \pm 1.1$             | $-18.3 \pm 0.9$              |
| P8                      | No           | -     | -                                | -                           | -                            |
| P10                     | Yes          | 57.7  | $-2.6 \pm 0.1$                   | $-26.7 \pm 1.0$             | $-25.1 \pm 1.1$              |
| P11                     | No           | -     | -                                | -                           | -                            |
| P12                     | No           | -     | -                                | -                           | -                            |
| P13                     | Yes          | 55.1  | $-2.3 \pm 0.12$                  | $-22.5 \pm 1.1$             | $-20.2 \pm 0.7$              |
| P14                     | Yes          | 56.3  | $-2.7 \pm 0.09$                  | $-28.5 \pm 1.3$             | $-25.8 \pm 1.2$              |
| P15                     | No           | -     | -                                | -                           | -                            |
| P16                     | No           | -     | -                                | -                           | -                            |
| P17                     | No           | -     | -                                | -                           | -                            |

$\Delta H^\circ$ , the enthalpy change;  $\Delta G^\circ$ , the free energy change;  $\Delta S^\circ$  the entropy change;  $T_M$ , melting temperature.

**Table S3. Oligonucleotides and primers in this study.**

| Name                    | Sequences (5'→3')          | Usage                                                              |
|-------------------------|----------------------------|--------------------------------------------------------------------|
| <b>Oligonucleotides</b> |                            |                                                                    |
| P2 -WT                  | GGUAAUAAAGGAGCUGGUGG       |                                                                    |
| P2 -MUT                 | GAUAAUAAAGAAGCUGAUGA       |                                                                    |
| P3-WT                   | GGUGUUGUUGGAGAAGGUUCCGAAGG |                                                                    |
| P3-MUT                  | GAUGUUGUUGAAGAAGAUUCCGAAGA |                                                                    |
| P4-WT                   | GGAGGAGGUGUUGCAGG          |                                                                    |
| P4-MUT                  | GAAGAAGAUGUUGCAGA          |                                                                    |
| P5-WT                   | GGAUACAAGGCUAUUGAUGGUGG    |                                                                    |
| P5-MUT                  | GAAUACAAGACUAUUGAUGAUGA    |                                                                    |
| P6-WT                   | GGUAUGUGGAAAGGUUAUGG       |                                                                    |
| P6-MUT                  | GAUAUGUGAAAAGAUUAUGA       |                                                                    |
| P8-WT                   | GGCUUAUAGGUUUAUGGUUAUUGG   | For spectroscopy fluorescence assays, CD measurements and NMR etc. |
| P8-MUT                  | GACUUAUAGAUUUAUGAUUAUGA    |                                                                    |
| P10-WT                  | GGCUGGCAAUGGCGG            |                                                                    |
| P10-MUT                 | GACUGACAAUGACGA            |                                                                    |
| P11-WT                  | GGUUGGUUUGUUACCUGGGAAGG    |                                                                    |
| P11-MUT                 | GAUUGAUUUGUUACCUGAGAAGA    |                                                                    |
| P12-WT                  | GGUGGAAUGUGGUAGG           |                                                                    |
| P12-MUT                 | GAUGAAAUGUGAUAGA           |                                                                    |
| P13-WT                  | GGUAUUGGUUGGUUUGG          |                                                                    |
| P13-MUT                 | GAAUAUGAUUGAUUUGA          |                                                                    |
| P14-WT                  | GGUGAUAGAGGUUUGUGGUGGUUGG  |                                                                    |
| P14-MUT                 | GAUGAUAGAGAUUUGUGAUGGUUGA  |                                                                    |



|         |                             |
|---------|-----------------------------|
| P15-WT  | GGAUUUGGAUGAUCUAUGUGGCAACGG |
| P15-MUT | GAAUUUGAAUGAUCUAUGUGACAACGA |
| P16-WT  | GGAUCUGGGUAAGGAAGG          |
| P16-MUT | GAAUCUGAGUAAGAAAGA          |
| P17-WT  | GGUUAAGTGGUGGUCUAGG         |
| P17-MUT | GAUUAAGTGAUGAUCUAGA         |

**Probes**

|    |                       |
|----|-----------------------|
| 1  | TGATTTTGGGGTCCATTATC  |
| 2  | AACGTAATGCGGGTGCATT   |
| 3  | AGTTGAATCTGAGGGTCCAC  |
| 4  | GTTCTCCATTCTGGTACTG   |
| 5  | CGACGTTGTTTTGATCGCGC  |
| 6  | AGACGCAGTATTATTGGGTA  |
| 7  | TGTTGAGTGAGAGCGGTGAA  |
| 8  | GGGAATTTAAGGTCTTCCTT  |
| 9  | AATTGGAACGCCTTGTCCCTC |
| 10 | CATCTGGACTGCTATTGGTG  |
| 11 | CTTCGGTAGTAGCCAATTTG  |
| 12 | ACCACGAATTCGTCTGGTAG  |
| 13 | GATCTTTCATTTTACCGTCA  |
| 14 | TTTGTTAGCACCATAGGGAA  |
| 15 | CAGTTGCAACCCATATGATG  |
| 16 | GATTGCAGCATTGTTAGCAG  |
| 17 | TAGAAGCCTTTTGGCAATGT  |
| 18 | ACGAGAAGAGGCTTGACTGC  |

For FISH assays

19 TGTTGCGACTACGTGATGAG  
 20 GCCTGGAGTTGAATTTCTTG  
 21 CAGGAGAAGTTCCCCTACTG  
 22 CAGCAAAGCAAGAGCAGCAT  
 23 AGCTGGTTCAATCTGTCAAG  
 24 TTTACCAGACATTTTGCTCT  
 25 TAGTGGCAGTACGTTTTTGC  
 26 GCTTGTGTTACATTGTATGC  
 27 TTTGTTCTGGACCACGTCTG  
 28 TGGTCCCCAAAATTCCTTG  
 29 AGTTCCTTGTCTGATTAGTT  
 30 CAATTTGCGGCCAATGTTTG  
 31 GAAGCGCTGGGGGCAAATTG  
 32 ATGCGCGACATTCCGAAGAA  
 33 CGAAGGTGTGACTTCCATGC  
 34 CTGTGTAGGTCAACCACGTT  
 35 ATTTGGATCTTTGTCATCCA  
 36 TTGTATGCGTCAATATGCTT  
 37 GGTAAGGCTTGAGTTTCATC  
 38 GAAGAGTCACAGTTTGCTGT  
 39 ATCATCCAAATCTGCAGCAG  
 40 GGATTGTTGCAATTGTTTGG

LNA-ASOs

P2 ACCAGCTCCTTTATTAC  
 P3 GGAACCTTCTCCAACAA

For ASO assays

P4 CCTGCAACACCTCCTCC  
 P6 ATAACCTTTCCACATAC  
 P10 ACCGCCATTGCCAGCCA  
 P13 CCAAACCAACCATATCC  
 P14 CCACCACAAACCTCTAT

**Fluorescently-labeled oligonucleotides**

P4-WT Cy5-GGAGGAGGUGUUGCAGG  
 P4-MUT Cy5-GAAGAAGAUGUUGCAGA

For immunofluorescence assays

**qRT-PCR primers for pro-inflammatory cytokines and chemokines**

*IL6*-F ACTCACCTCTTCAGAACGAATTG  
*IL6*-R CCATCTTTGGAAGGTTCAGGTTG  
*CXCL10*-F CTGAGCCTACAGCAGAGGAAC  
*CXCL10*-R GATGCAGGTACAGCGTACAGT  
*CXCL11*-F GCATAGGCCCTGGGGTAAAA  
*CXCL11*-R TTGGACTCCTTTGGGCAGTG  
*CXCL3*-F GCCCAAACCGAAGTCATAGC  
*CXCL3*-R CCCTGCAGGAAGTGTCAATG  
*IFNB1*-F AGTAGGCGACACTGTTCGTG  
*IFNB1*-R AGCCTCCCATTCAATTGCCA  
*ISG15*-F CAGCGAACTCATCTTTGCCAG  
*ISG15*-R GACACCTGGAATTCGTTGCC  
*Il6*-F GACTGGGGATGTCTGTAGCTC  
*Il6*-R CACCAGCATCAGTCCCAAGA  
*Cxcl10*-F ACTCCCCTTTACCCAGTGGA  
*Cxcl10*-R AGGACCATGGCTTGACCATC

Human *IL6* mRNA quantification

Human *CXCL10* mRNA quantification

Human *CXCL11* mRNA quantification

Human *CXCL3* mRNA quantification

Human *IFNB1* mRNA quantification

Human *ISG15* mRNA quantification

Mouse *Il6* mRNA quantification

Mouse *Cxcl10* mRNA quantification

|                                                   |                        |                                         |
|---------------------------------------------------|------------------------|-----------------------------------------|
| <i>Cxcl11</i> -F                                  | CCACGCTACCTTCTGTGGTT   | Mouse <i>Cxcl11</i> mRNA quantification |
| <i>Cxcl11</i> -R                                  | ATGTTTCGTGTGCCTCGTGAT  |                                         |
| <i>Cxcl3</i> -F                                   | CAGTGCCTGAACACCCTACC   | Mouse <i>Cxcl3</i> mRNA quantification  |
| <i>Cxcl3</i> -R                                   | GGACTTGCCGCTCTTCAGTA   |                                         |
| <i>Ifnb1</i> -F                                   | CTCCAGCACTGGGTGGAATG   | Mouse <i>Ifnb1</i> mRNA quantification  |
| <i>Ifnb1</i> -R                                   | AGTTGAGGACATCTCCCACG   |                                         |
| <i>Isg15</i> -F                                   | ACGATTTCTGGTGTCCGTG    | Mouse <i>Isg15</i> mRNA quantification  |
| <i>Isg15</i> -R                                   | AGACCCAGACTGGAAAGGGT   |                                         |
| <b>qRT-PCR primers for RNA replication assays</b> |                        |                                         |
| G4 RNA_F                                          | TCTAGGTTTCGTCCGGGTGT   | The RNA with G4 site quantification     |
| G4 RNA_R                                          | GCCTCGGTGAAAATGTGGTG   |                                         |
| <i>GAPDH</i> _F                                   | CGGAGTCAACGGATTTGGTCGT | <i>GAPDH</i> mRNA quantification        |
| <i>GAPDH</i> _R                                   | TCTCAGCCTTGACGGTGCCA   |                                         |

---

CD, Circular Dichroism; etc., et cetera; F, forward primer; R, reverse primer; qRT-PCR, quantitative real-time polymerase chain reaction.

**a**

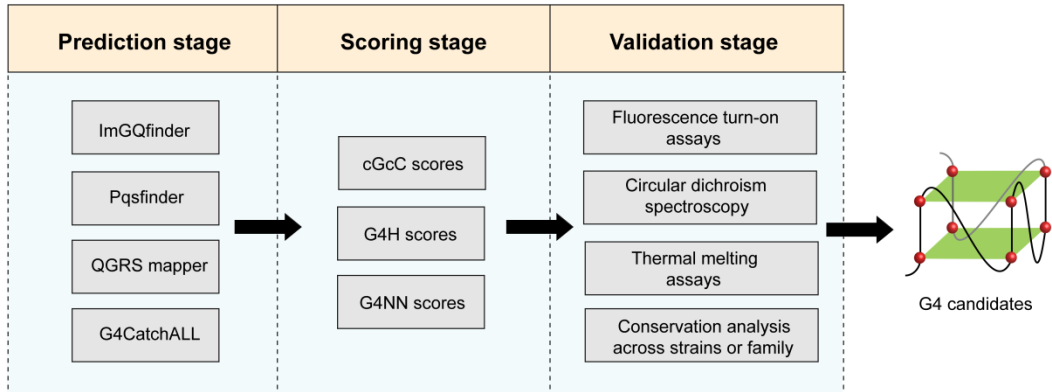

**b**

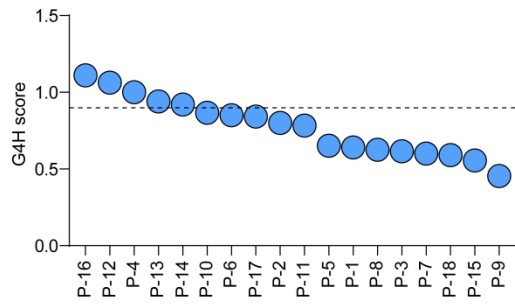

**c**

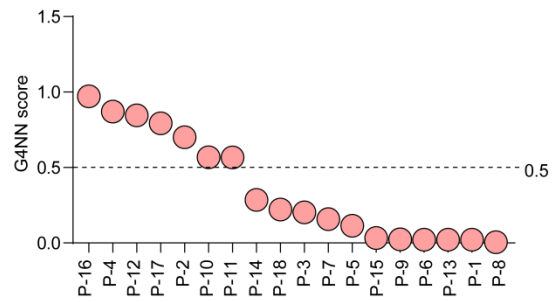

**Fig. S1 Identification and selection of G-quadruplexes (G4s) in SARS-CoV-2 genome.** **a** Schematic summary of the bioinformatic workflow conducted for PQSs identification and selection in SARS-CoV-2 genome. **b** The G4H score of PQSs in the SARS-CoV-2 genome. G4H, G4hunter. **c** The G4NN score of PQSs in the SARS-CoV-2 genome. G4NN, G4 neural network.

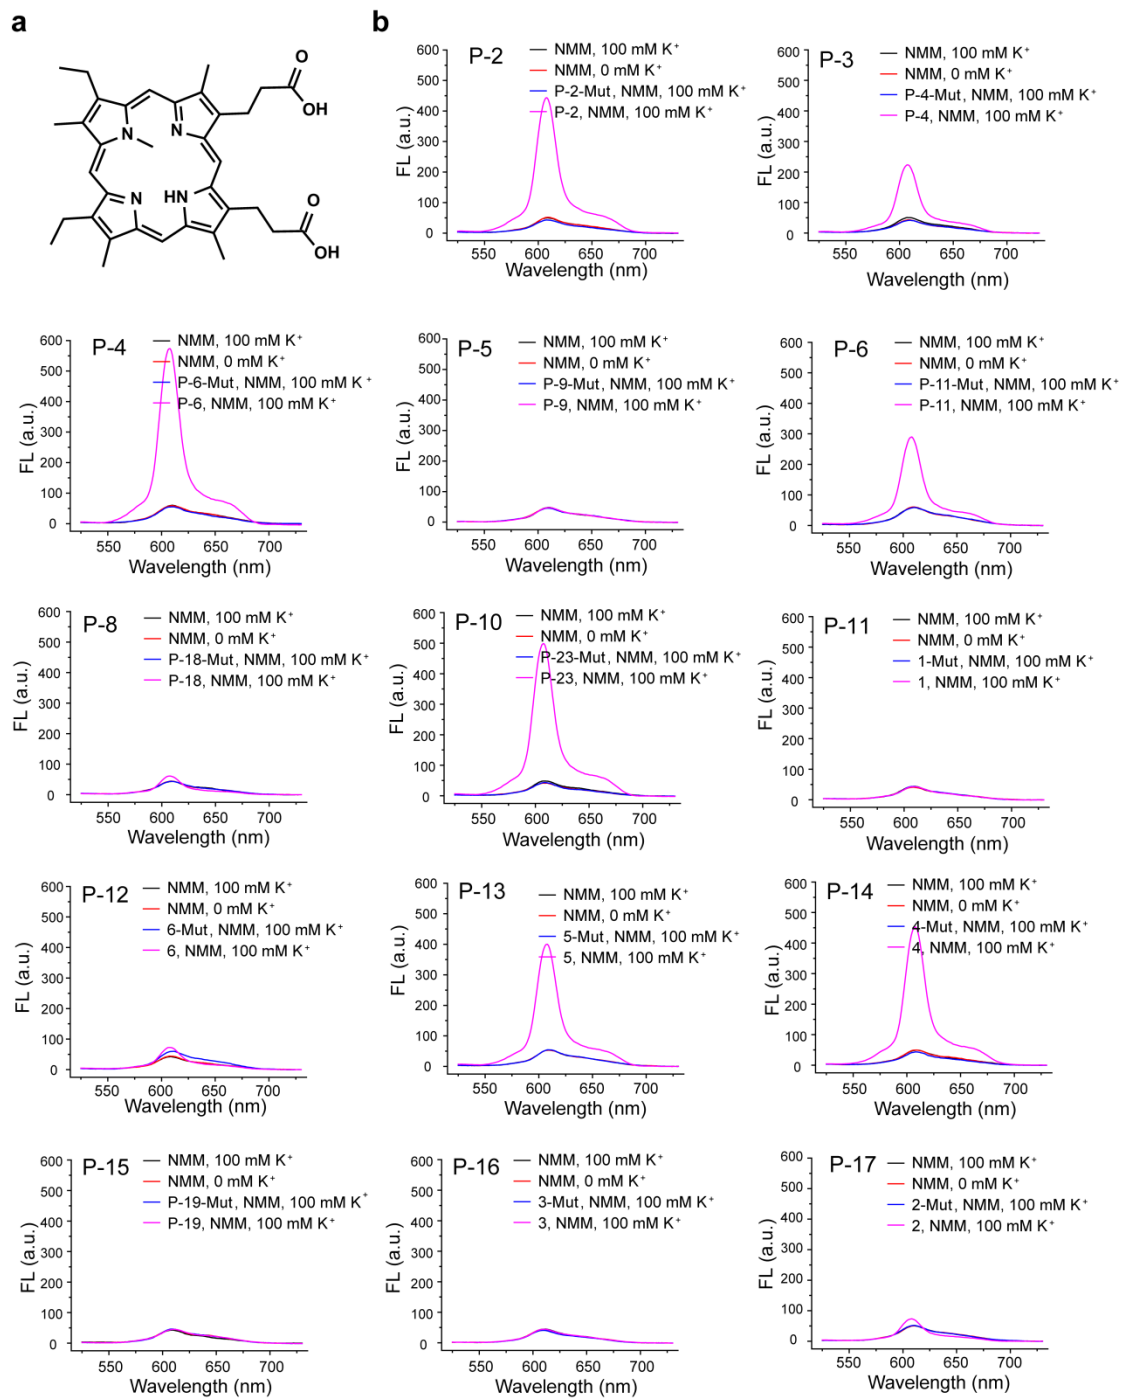

**Fig. S2 Screening the PQSs in SARS-CoV-2 genome by fluorescence turn-on assays.** **a** Chemical structures of G4 specific small molecule N-methyl mesoporphyrin IX (NMM). **b** Fluorescence turn-on assays of NMM in the absence or presence of all PQSs (P2, P3, P4, P5, P6, P8, P10, P11, P12, P13, P14, P15, P16 and P17) and their G/A mutants under indicated conditions. PQSs, putative G4-forming sequences.



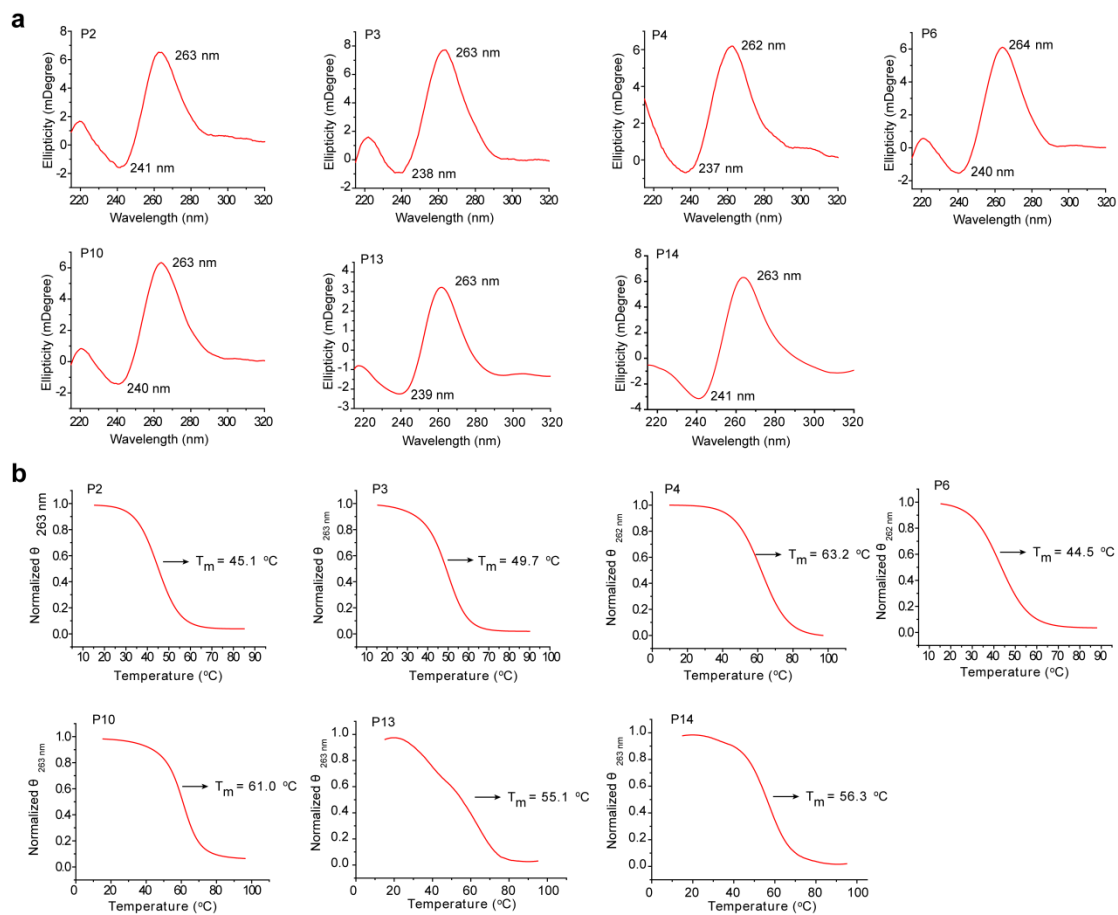

**Fig. S3 The structure and stability of PQS candidates.** **a** CD spectroscopy of PQS candidates (P2, P3, P4, P6, P10, P13, P14) and their G/A mutants. **b** CD thermal melting curves of PQS candidates and their G/A mutants. CD, circular dichroism.

**a**

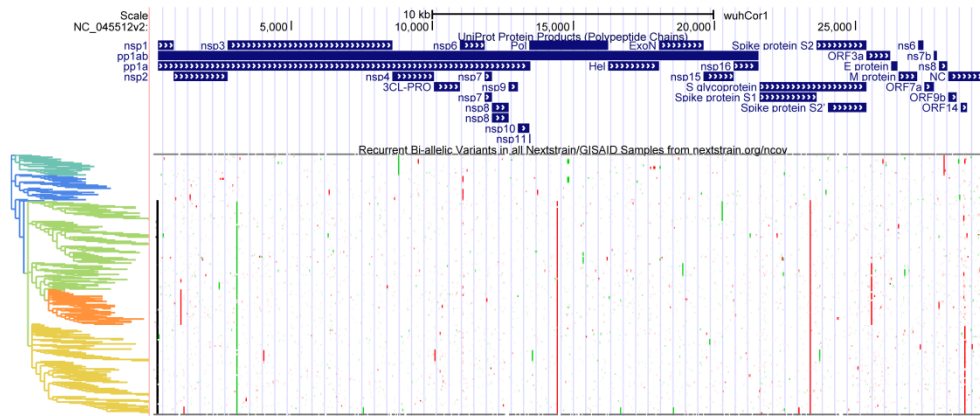

**b**

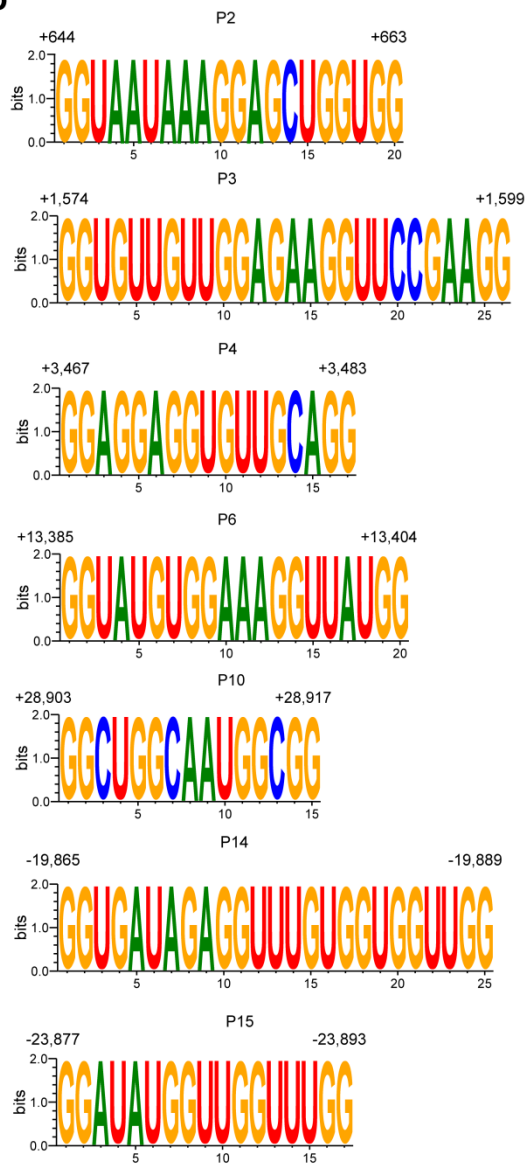

**c**

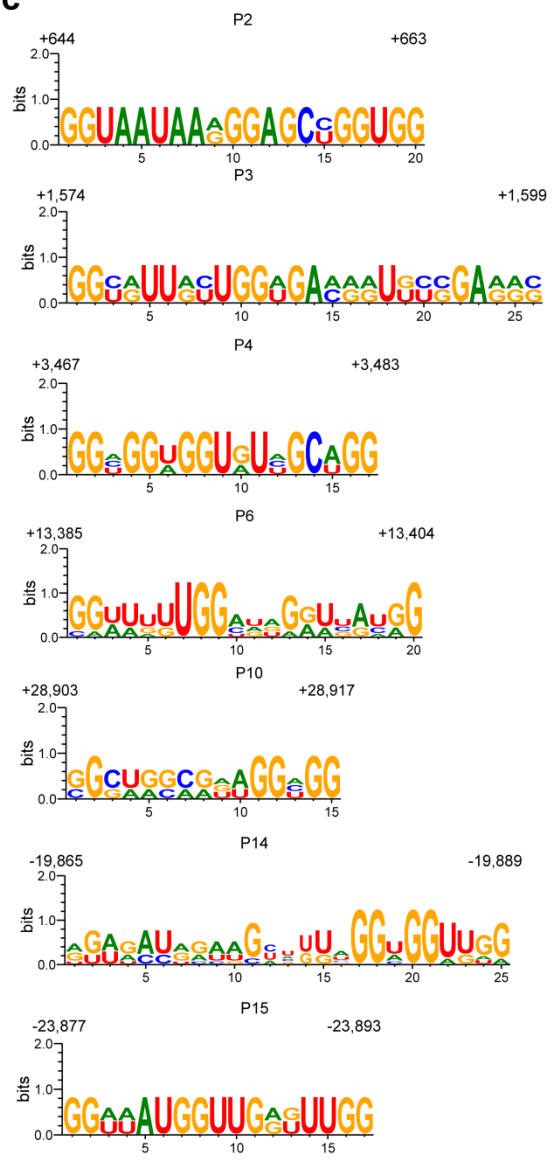

**Fig. S4 The analysis of the conservation of PQS candidates.** **a** Recurrent Bi-allelic Variants in all Nextstrain/GISAID Samples from nextstrain.org/ncov. **b** The analysis of conservation of the PQS candidates across strains by using the WebLogo 3 software program. **c** The analysis of conservation of the PQS candidates throughout the human coronavirus family by using the WebLogo 3 software program.

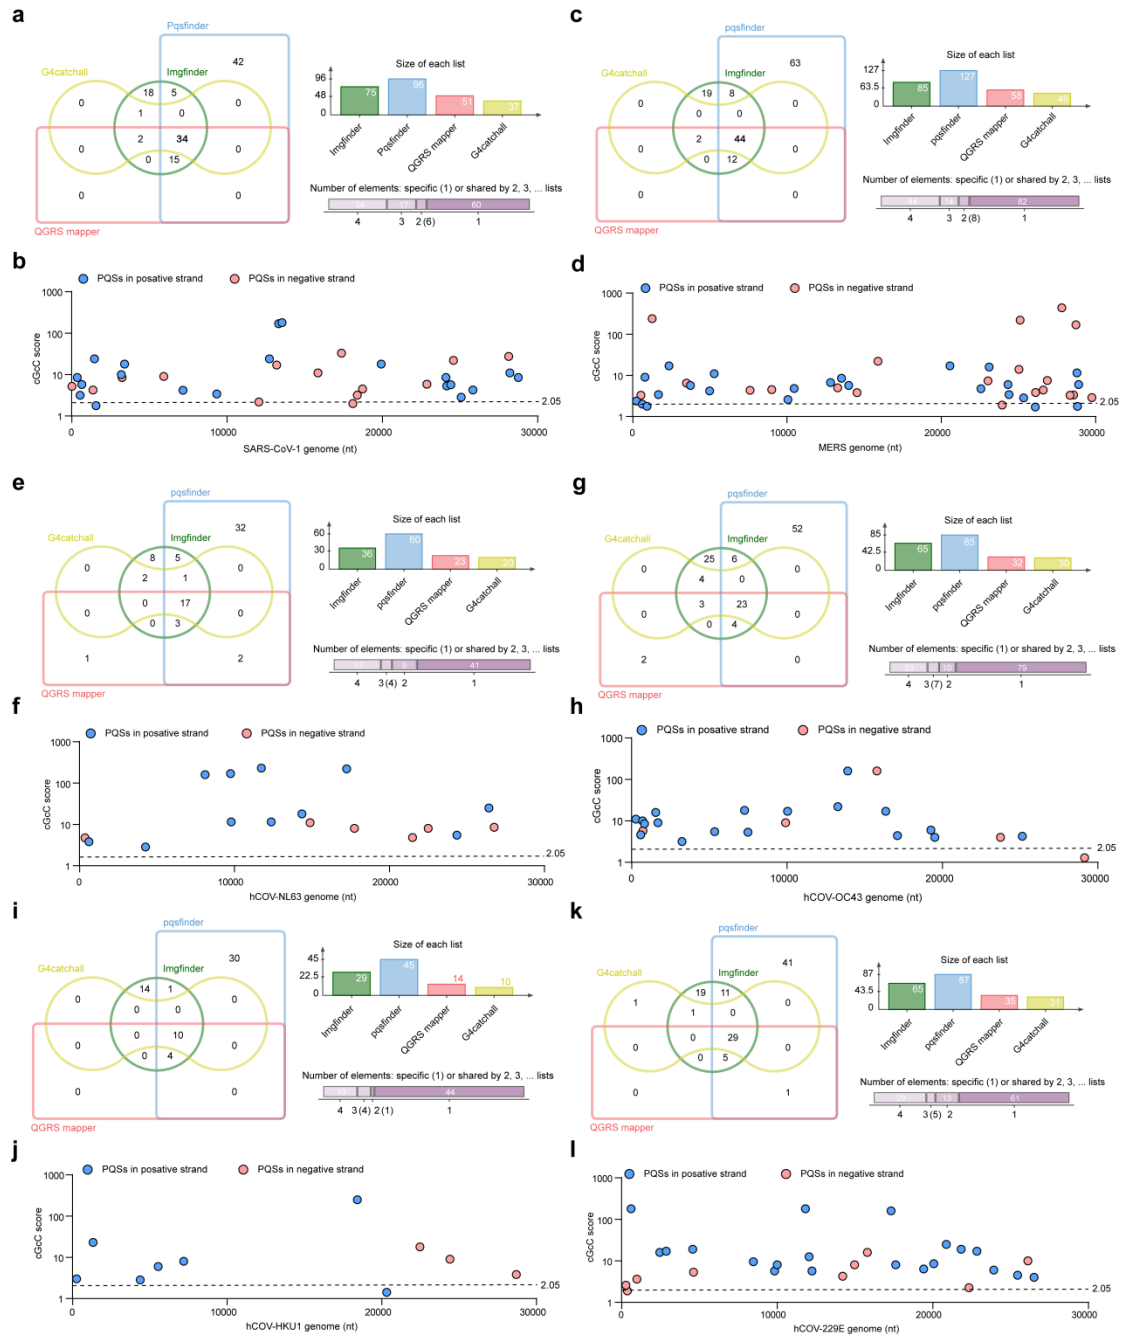

**Fig. S5 Visualization of the PQSs in six human coronaviruses.** **a** Edwards' Venn diagram showing the overlap of the putative G4-forming sequences (PQSs) predicted by four independent software (G4catchall, QGRS mapper, Pqsfinder and ImGQfinder) in SARS-CoV-1 genome. Charts showing the list size and intersection size repartition located underneath the diagram. **b** The cGcC score and location of PQSs in the MERS-CoV genome. The cG/cC score of PQSs is calculated by using G4RNA screener. **c** Edwards' Venn diagram showing the overlap of the putative G4-forming sequences (PQSs) predicted by four independent software in MERS-CoV genome. **d** The cGcC score and location of PQSs in the MERS-CoV genome. **e** Edwards' Venn diagram showing the overlap of the putative G4-forming sequences (PQSs) predicted by four independent software in HCoV-NL63 genome. **f** The cGcC score and location of PQSs in the HCoV-NL63 genome. **g** Edwards' Venn diagram showing the overlap of the putative G4-forming sequences (PQSs) predicted by four independent software in HCoV-OC43 genome. **h** The cGcC score and location of PQSs in the HCoV-OC43 genome. **i** Edwards' Venn diagram showing the overlap of the putative G4-forming sequences (PQSs) predicted by four independent software in HCoV-HKU1 genome. **j** The cGcC score and location of PQSs in the HCoV-HKU1 genome. **k** Edwards' Venn diagram showing the overlap of the putative G4-forming sequences (PQSs) predicted by four independent software in HCoV-229E genome. **l** The cGcC score and location of PQSs in the HCoV-229E genome.

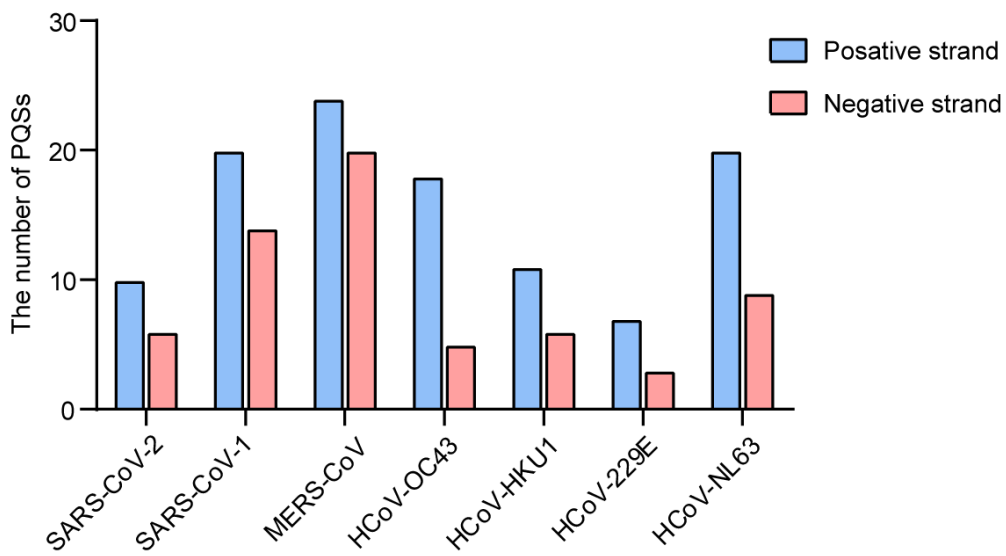

**Fig. S6 The number of PQSs in seven human coronaviruses.** The blue column represents the G4 numbers in positive strand, and the red shows the numbers in negative strand.



**a**

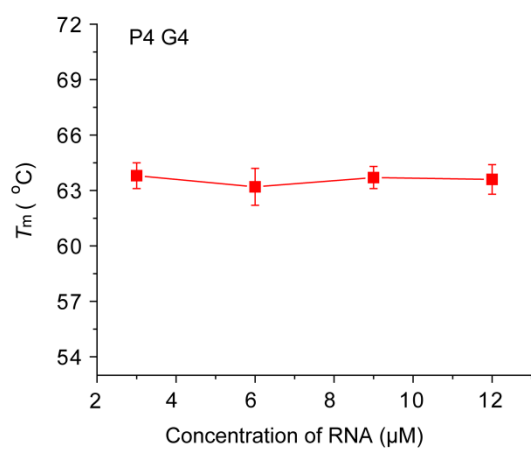

**b**

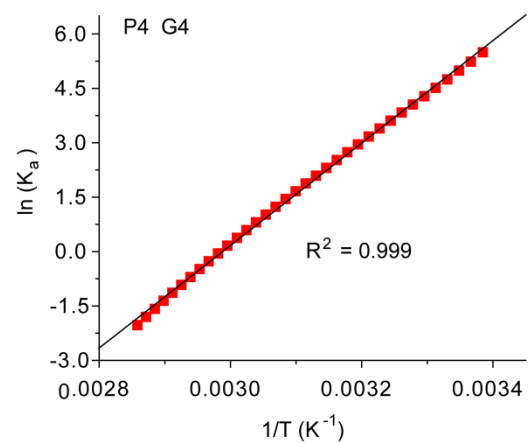

**Fig. S7 The formation of P4 G4 in vitro.** **a** Plots of melting temperature ( $T_m$ ) versus concentration of P4. Melting assays were carried out in 10 mM Tris-HCl, 100 mM KCl, pH = 7.2 buffer. **b** Determination of  $\Delta G^\circ_{25}$ ,  $\Delta H^\circ$  and  $\Delta S^\circ$  for P4 G4 formation. The thermodynamic parameters were estimated from the melting measurements. Experiments were carried out in 10 mM Tris-HCl, 100 mM KCl, pH = 7.2 buffer.

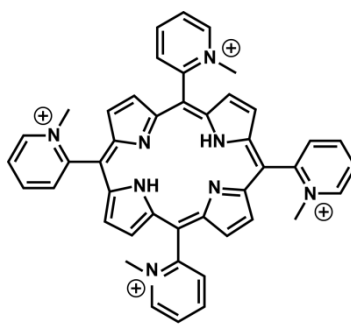

TMPyP2

**Fig. S8 Chemical structures of TMPyP2.**

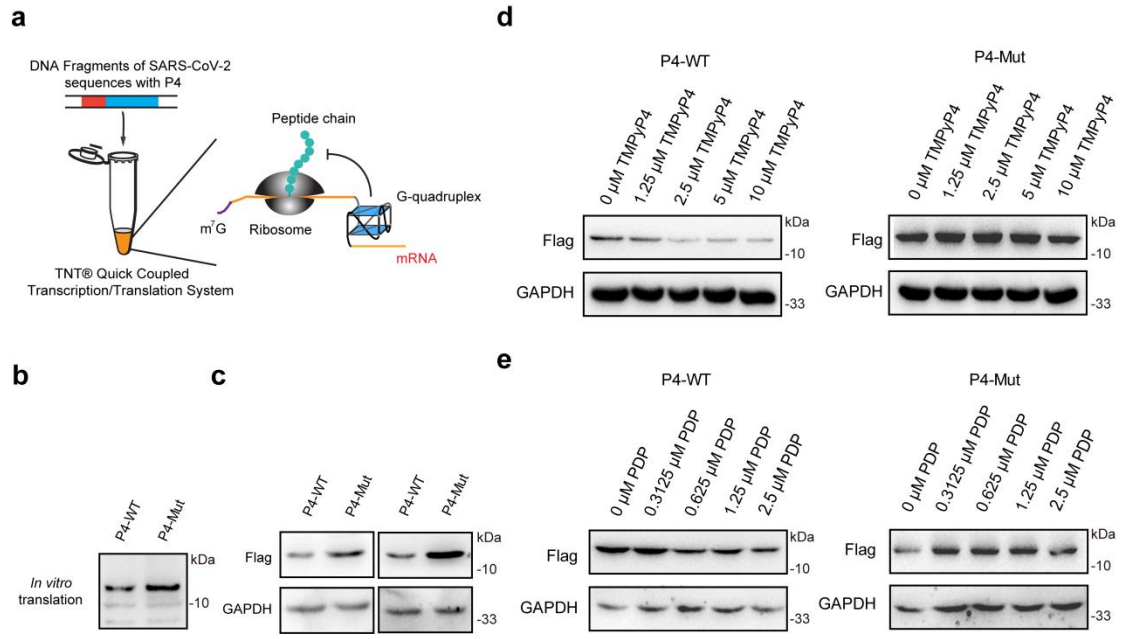

**Fig. S9 The formation of P4 G4 inhibits the protein expression.** **a** Schematic representation of in vitro translation (IVT) assays. **b** G4 formation of P4 inhibits mRNA translation by performing IVT assays. **c** G4 formation of P4 inhibits protein expression in HEK293T and Hela cells. **d** TMPyP4 treatment inhibits the protein expression by targeting P4 G4 in HEK293T cells in a dose-dependent manner, but not P4-Mut. **e** PDP treatment inhibits the protein expression by targeting P4 G4 in HEK293T cells in a dose-dependent manner, but not P4-Mut.

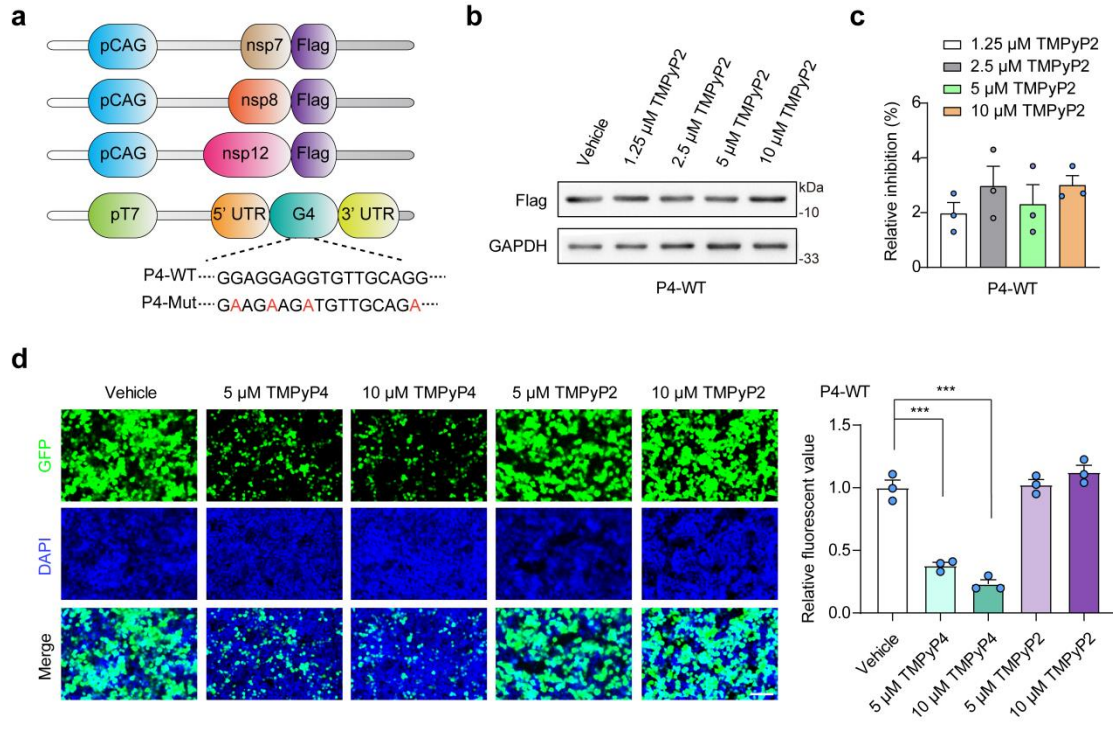

**Fig. S10 TMPyP2 treatment does not inhibit the RNA translation and replication.**

**a** The expression vectors of SARS-CoV-2 RNA-dependent RNA polymerase complexes (nsp7, nsp8 and nsp12). The pGEMT vectors carrying P4 sequences fused to SARS-CoV-2 5'UTR and 3'UTR. **b** TMPyP2 treatment shows no effects on the protein expression of P4-WT in HEK293T cells. **c** TMPyP2 treatment shows no effects on the RNA replication of RNA with P13 G4 in HEK293T cells, detected by qRT-PCR assays. **d** HEK293T cells infected with P4-EGFP lentivirus were treated with or without TMPyP4 or TMPyP2 as indicated. Left: representative confocal images were demonstrated. Scale bars: 100  $\mu$ m. Right: the relative fluorescent value was measured. Data are shown as mean  $\pm$  SEM of three independent experiments, two-tailed Student's t test. SEM, standard error of mean. \*\*\*  $P < 0.001$ .



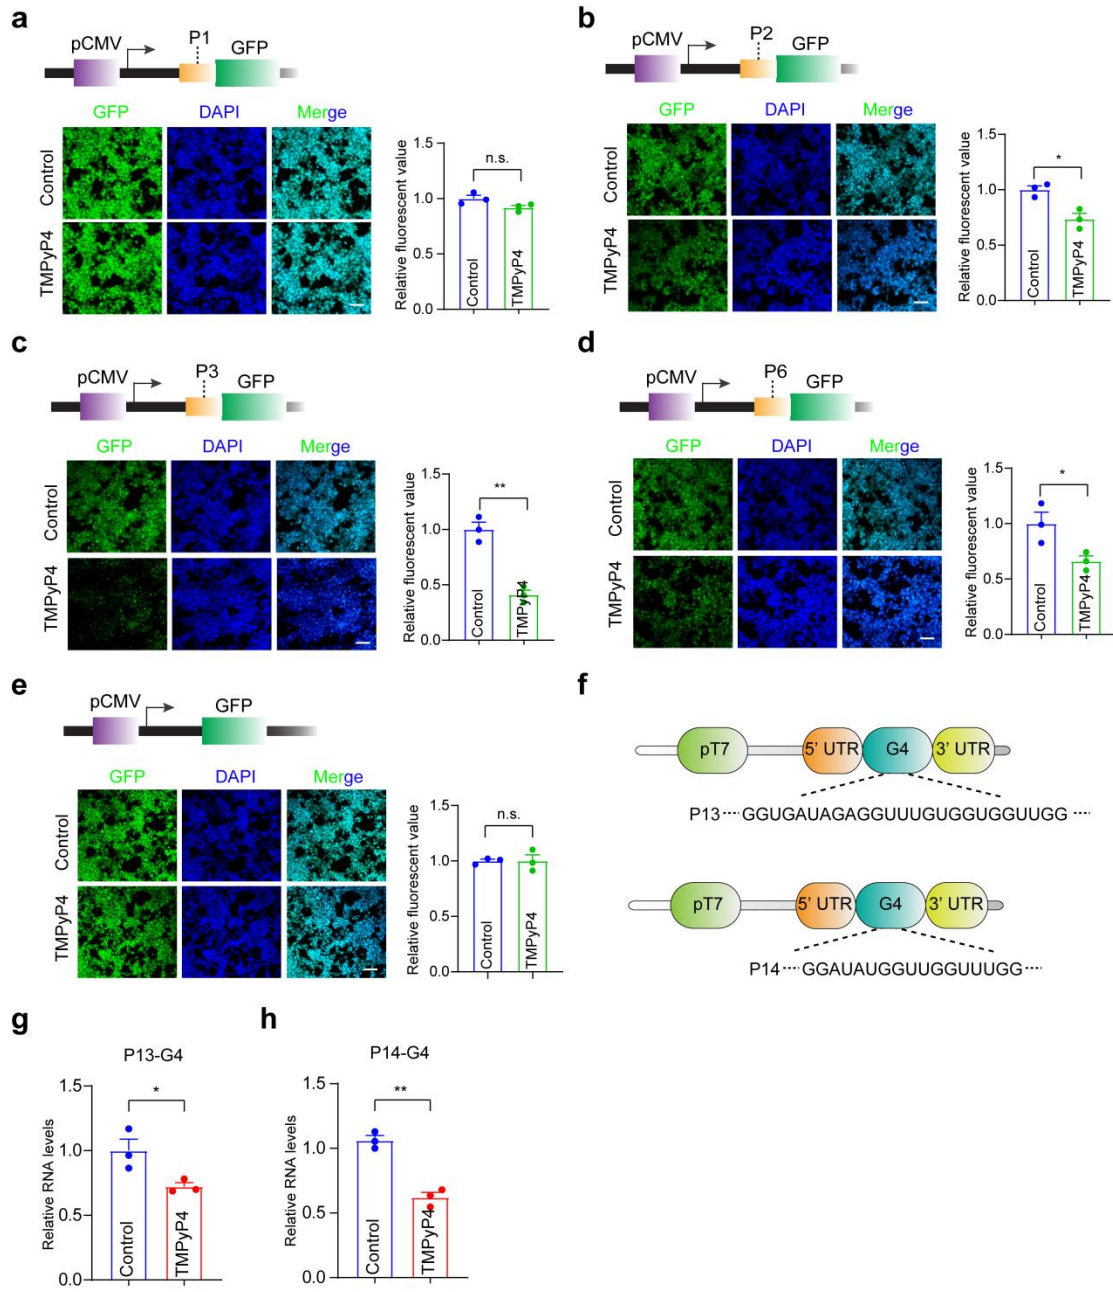

**Fig. S11 TMPyP4 treatment suppresses the RNA translation and replication by targeting the other G4s in SARS-CoV-2.** **a-e** HEK293T cells transfected with P1-EGFP (a), P2-EGFP (b), P3-EGFP (c) P6-EGFP (d) and EGFP (e) were treated with or without 10  $\mu$ M TMPyP4. Confocal fluorescence microphotographs of the same cells with GFP (left), DAPI (middle) or Merge (right) were demonstrated (scale bar = 50  $\mu$ m). The relative fluorescent value was measured. **f** The pGEMT vectors carrying P13 or P14 sequences fused to SARS-CoV-2 5'UTR and 3'UTR. **g** TMPyP4 treatment inhibited the replication of RNA with P13 G4 in HEK293T cells, detected by qRT-PCR assays. **h** TMPyP4 treatment inhibited the replication of RNA with P14 G4 in HEK293T cells, detected by qRT-PCR assays. Data are shown as mean  $\pm$  SEM of three independent experiments, two-tailed Student's t test. SEM, standard error of mean. n.s., not significant. \* $P < 0.05$ , \*\* $P < 0.01$ .

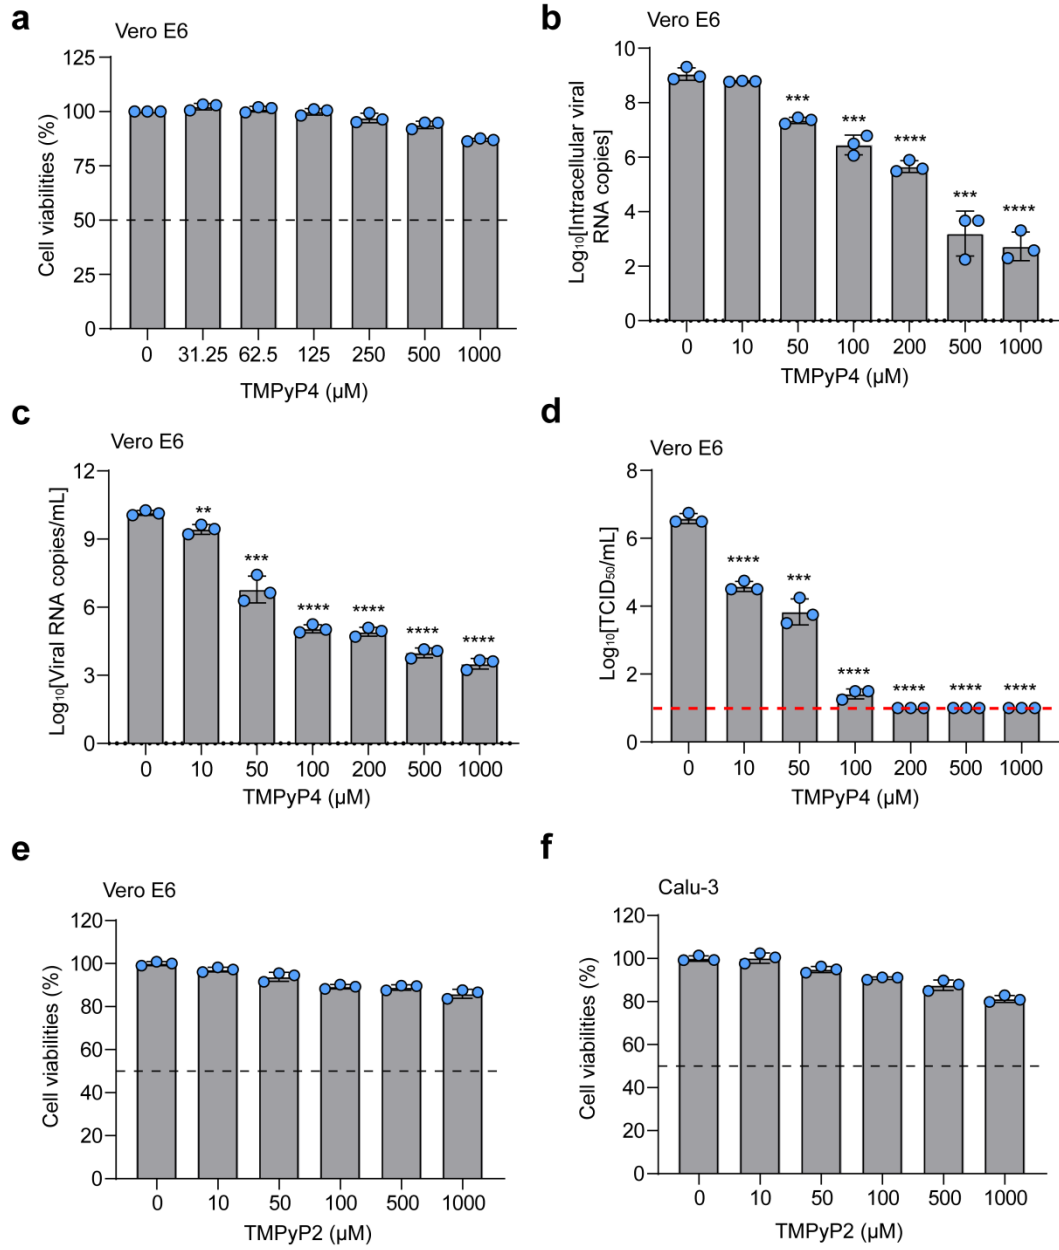

**Fig. S12 The cytotoxicity and antiviral activity of TMPyP4 and TMPyP2 treatment in Vero E6 cells.** **a** The cytopathic effect caused by different doses of TMPyP4 treatment for 48 h in Vero E6 cells was quantitatively analyzed by using SRB assays. **b** Vero E6 cells were infected with SARS-CoV-2 ( $10^2$  TCID<sub>50</sub> virus/mL) and treated with different concentrations of TMPyP4. At 3 dpi, viral RNA copies (per mL) were quantified from cell lysates by qRT-PCR. **c** Vero E6 cells were infected with SARS-CoV-2 ( $10^2$  TCID<sub>50</sub> virus/mL) and treated with different concentrations of TMPyP4. At 3 day post infection (dpi), viral RNA copies (per mL) were quantified from cell culture supernatants by qRT-PCR. **d** Vero E6 cells were infected with SARS-CoV-2 ( $10^2$  TCID<sub>50</sub> virus/mL) and treated with different concentrations of TMPyP4. At 3 dpi, viral loads ( $\log_{10}$ TCID<sub>50</sub>/mL) were quantified by TCID<sub>50</sub>. Lower limit of detection (LLOD) for viral titers is indicated with a red dotted line. **e,f** The cytopathic effect caused by different doses of TMPyP4 treatment for 48 h in Vero E6 (Ee) or Calu-3 (f) cells was quantitatively analyzed by using SRB assays. Data are shown as mean  $\pm$  SEM of three independent experiments, two-tailed Student's t test. \*\*  $P < 0.01$ , \*\*\*  $P < 0.001$ , \*\*\*\*  $P < 0.0001$ .

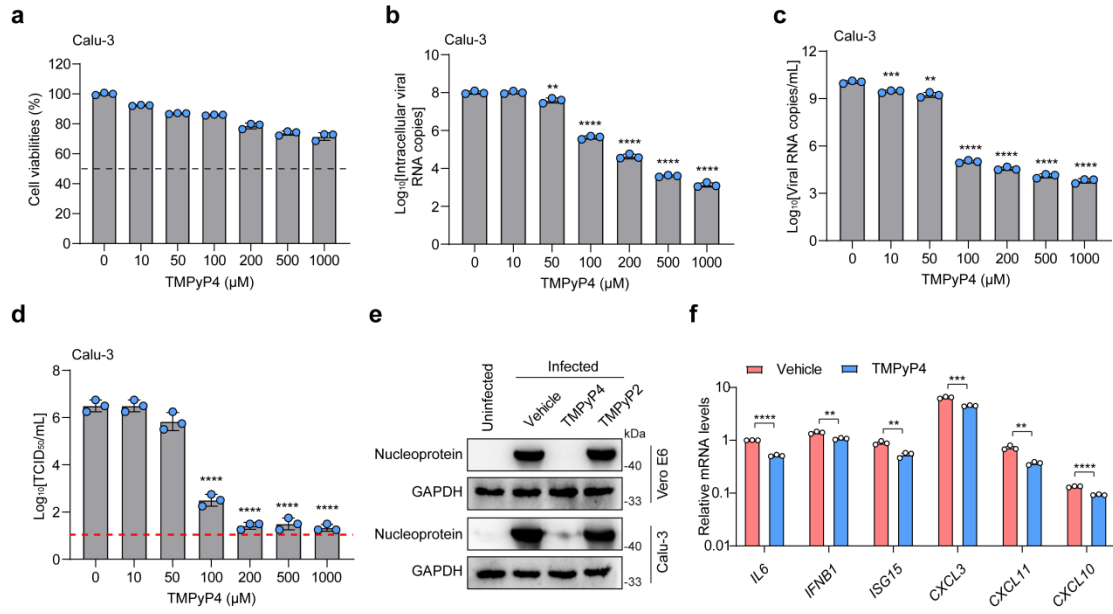

**Fig. S13 The cytotoxicity and antiviral activity of TMPyP4 in Calu-3 cells.** **a** The cytopathic effect caused by different doses of TMPyP4 treatment for 48 h in Calu-3 cells was quantitatively analyzed by using SRB assays. **b** Calu-3 cells were infected with SARS-CoV-2 ( $10^3$  TCID<sub>50</sub> virus/mL) and treated with different concentrations of TMPyP4. At 3 dpi, viral RNA copies (per mL) were quantified from cell lysates by qRT-PCR. **c** Calu-3 cells were infected with SARS-CoV-2 ( $10^3$  TCID<sub>50</sub> virus/mL) and treated with different concentrations of TMPyP4. At 3 day post infection (dpi), viral RNA copies (per mL) were quantified from cell culture supernatants by qRT-PCR. **d** Calu-3 cells were infected with SARS-CoV-2 ( $10^3$  TCID<sub>50</sub> virus/mL) and treated with different concentrations of TMPyP4. At 3 dpi, viral titers ( $\log_{10}$ TCID<sub>50</sub>/mL) were quantified by TCID<sub>50</sub>. Lower limit of detection (LLOD) for viral titers is indicated with a red dotted line. **e** Vero E6 and Calu-3 cells were infected with SARS-CoV-2 ( $10^3$  TCID<sub>50</sub> virus/mL) and treated with 100  $\mu$ M TMPyP4 or 100  $\mu$ M TMPyP2. The protein expression of viral nucleoprotein was detected by western blotting assays. **f** Calu-3 cells were infected with SARS-CoV-2 ( $10^3$  TCID<sub>50</sub> virus/mL) and treated with 100  $\mu$ M TMPyP4. The mRNA levels of chemokine and cytokine were detected by qRT-PCR. Data are shown as mean  $\pm$  SEM of three independent experiments, two-tailed Student's t test. \*\*  $P < 0.01$ , \*\*\*  $P < 0.001$ , \*\*\*\*  $P < 0.0001$ .

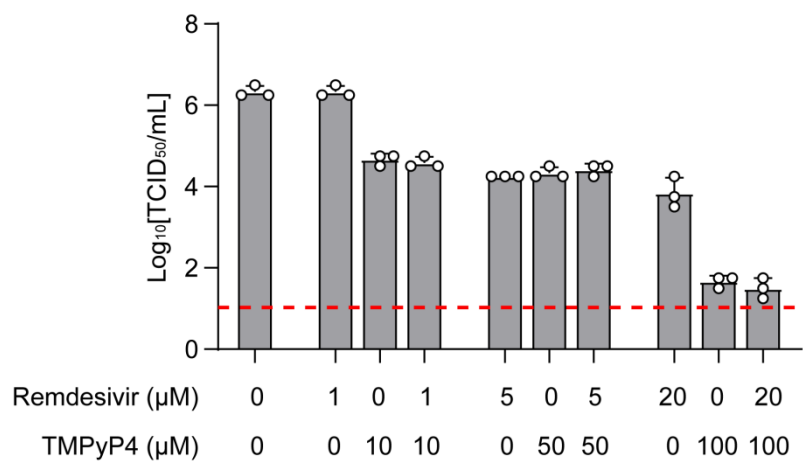

**Fig. S14 TMPyP4 did not exhibit antiviral synergy with remdesivir.** Vero E6 cells were infected with SARS-CoV-2 ( $10^3$  TCID<sub>50</sub> virus/mL) and treated with different concentrations of TMPyP4 or remdesivir as indicated. At 3 dpi, viral titers ( $\log_{10}$ TCID<sub>50</sub>/mL) were quantified by TCID<sub>50</sub>. Lower limit of detection for viral titers is indicated with a red dotted line. Data are shown as mean  $\pm$  SEM of three independent experiments.



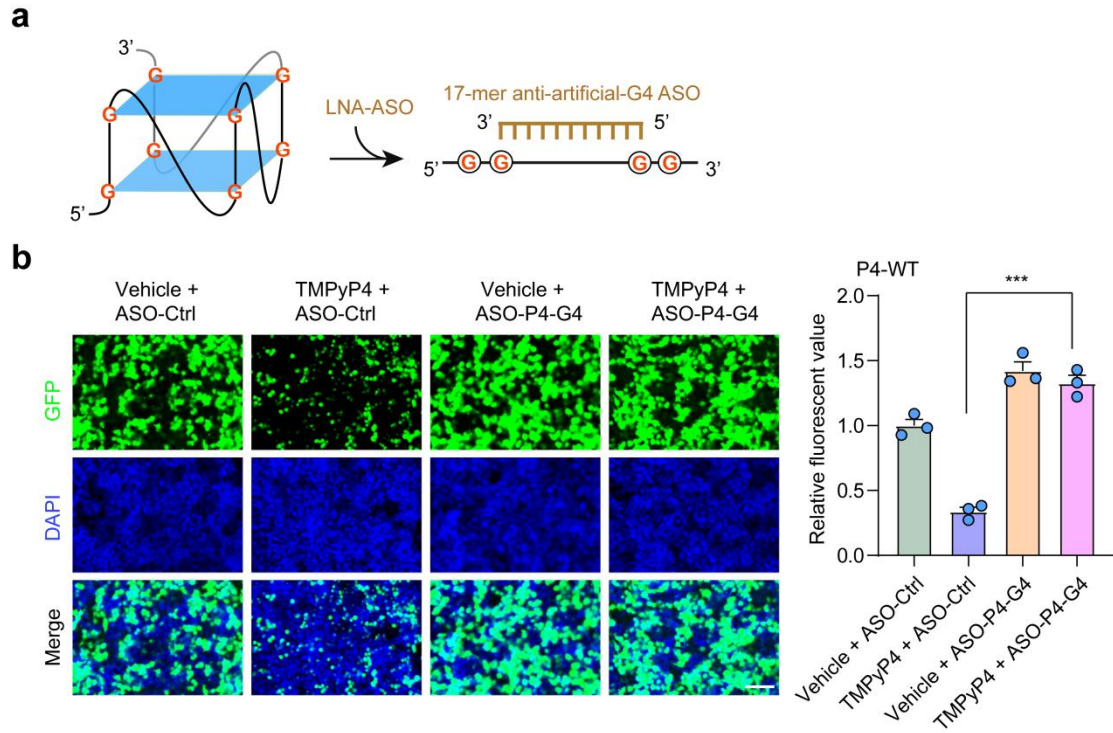

**Fig. S15 ASO suppresses the effect of TMPyP4 on P4-EGFP SARS-CoV-2 lentivirus infection.** **a** Schematic representation of the antisense oligonucleotide-based strategy to unfold viral G4 structures. **b** HEK293T cells infected with P4-EGFP lentivirus treated with or without 10  $\mu$ M TMPyP4 were pre-transfected with the ASOs targeting P4 G4. Left: representative confocal images were demonstrated. Scale bars: 100  $\mu$ m. Right: the relative fluorescent value was measured. Data are shown as mean  $\pm$  SEM of three independent experiments, two-tailed Student's t test. \*\*\* $P < 0.001$ .

**a**

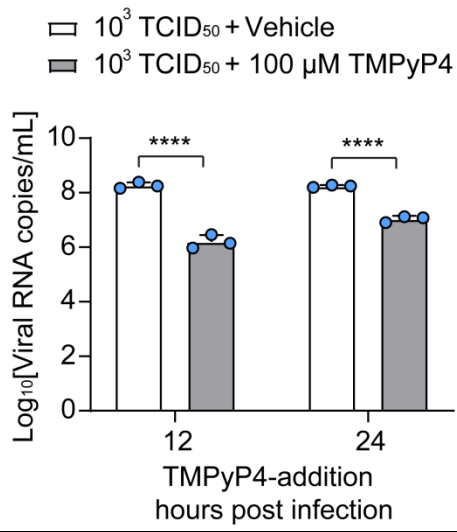

**b**

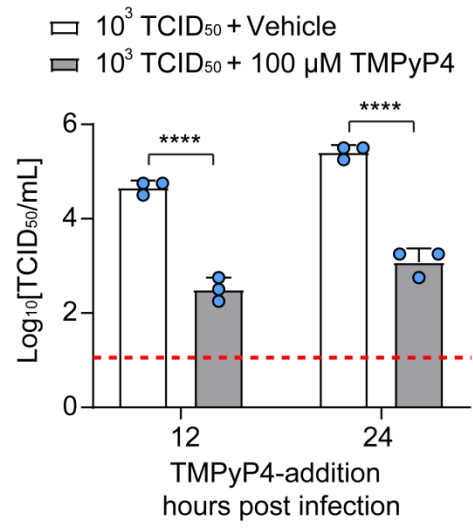

**Fig. S16 Therapeutic treatment of TMPyP4 inhibits viral replication in Vero E6 cells.** **a,b** The Vero E6 cells treated with 100  $\mu$ M TMPyP4 were pre-infected with SARS-CoV-2 ( $10^3$  TCID<sub>50</sub> virus/mL) for 12 or 24 h. At 48 h post TMPyP4 treatment, viral RNA copies in cell culture supernatants (a) were detected by qRT-PCR. Viral titers ( $\log_{10}$ TCID<sub>50</sub>/mL) (b) were quantified by TCID<sub>50</sub>. Lower limit of detection for viral titers is indicated with a red dotted line. Data are shown as mean  $\pm$  SEM, two-tailed Student's t test. \*\*\*\*  $P < 0.0001$ .

**A**

| Compound | Admin           | $t_{1/2}$ | $T_{max}$ | $C_{max}$ | $AUC_{0-t}$ | $AUC_{0-inf\_obs}$ | $AUMC_{0-inf\_obs}$  | $MRT_{0-inf\_obs}$ | $Vz/F_{obs}$ | $Cl/F_{obs}$   |
|----------|-----------------|-----------|-----------|-----------|-------------|--------------------|----------------------|--------------------|--------------|----------------|
|          |                 | h         | h         | µg/mL     | µg/mL*h     | µg/mL*h            | µg/mL*h <sup>2</sup> | h                  | (mg)/(µg/mL) | (mg)/(µg/mL)/h |
| TMPyP4   | i.n. (30 mg/kg) | 6.35763   | 1.00000   | 17.87750  | 155.27837   | 167.31544          | 1519.69406           | 9.04660            | 1.64223      | 0.17985        |
|          |                 | ± 0.66817 | ± 0.00000 | ± 1.23902 | ± 7.56589   | ± 11.35503         | ± 239.47784          | ± 0.82337          | ± 0.08137    | ± 0.01201      |

**B**

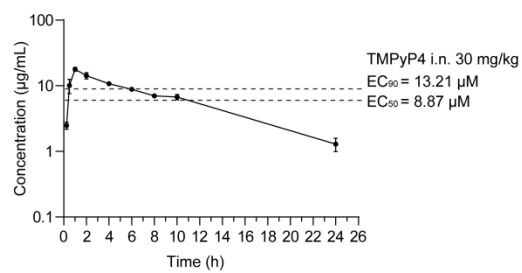

**Fig. S17 Primary pharmacokinetic (PK) evaluation of TMPyP4 in hamsters. a** Primary PK evaluation of TMPyP4 (i.n. 30 mg/kg) in hamsters ( $n = 3$ ). **b** The mean plasma concentration-time curves of TMPyP4 (i.n. 30 mg/kg).

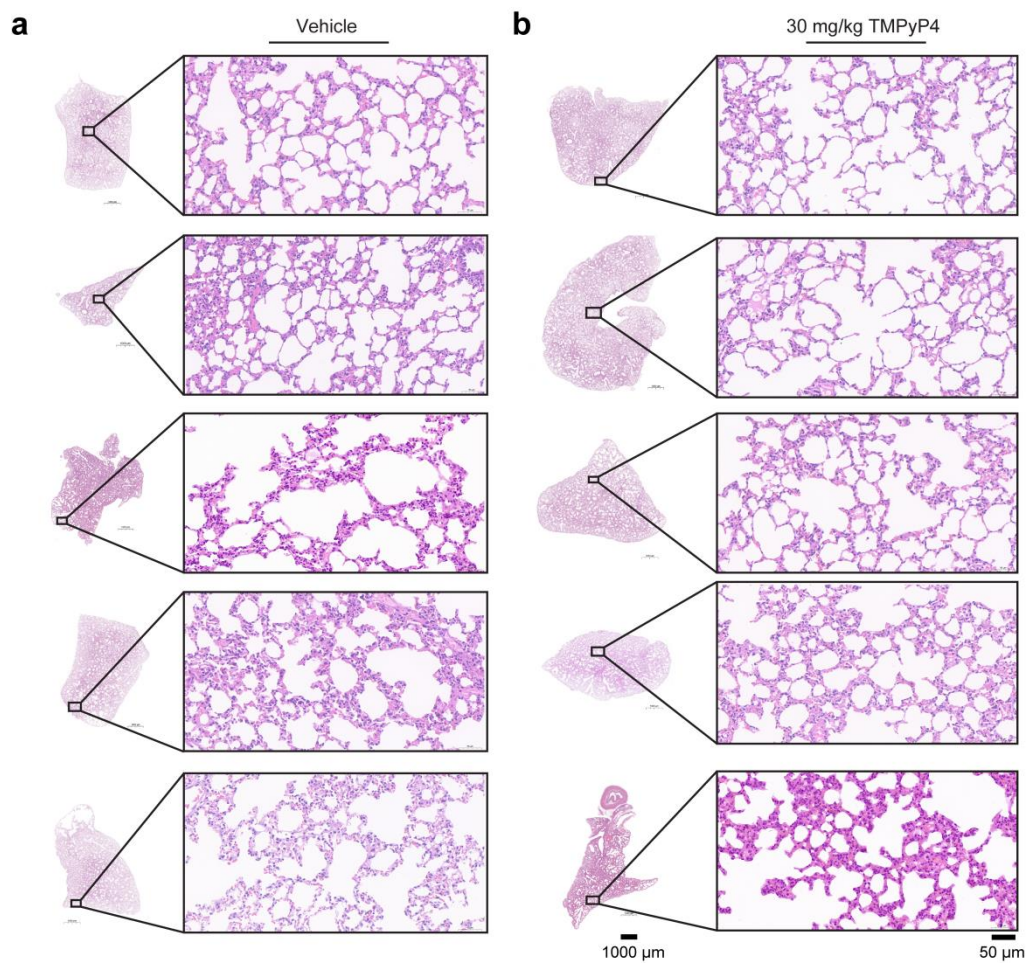

**Fig. S18 Intranasal administration of TMPyP4 (30 mg/kg) once daily for 7 consecutive days show no noticeable toxicity in the lung tissues of hamsters. a,b** The whole lung slide scan images from vehicle (a) and TMPyP4-treated (b) hamsters ( $n = 5$ ).



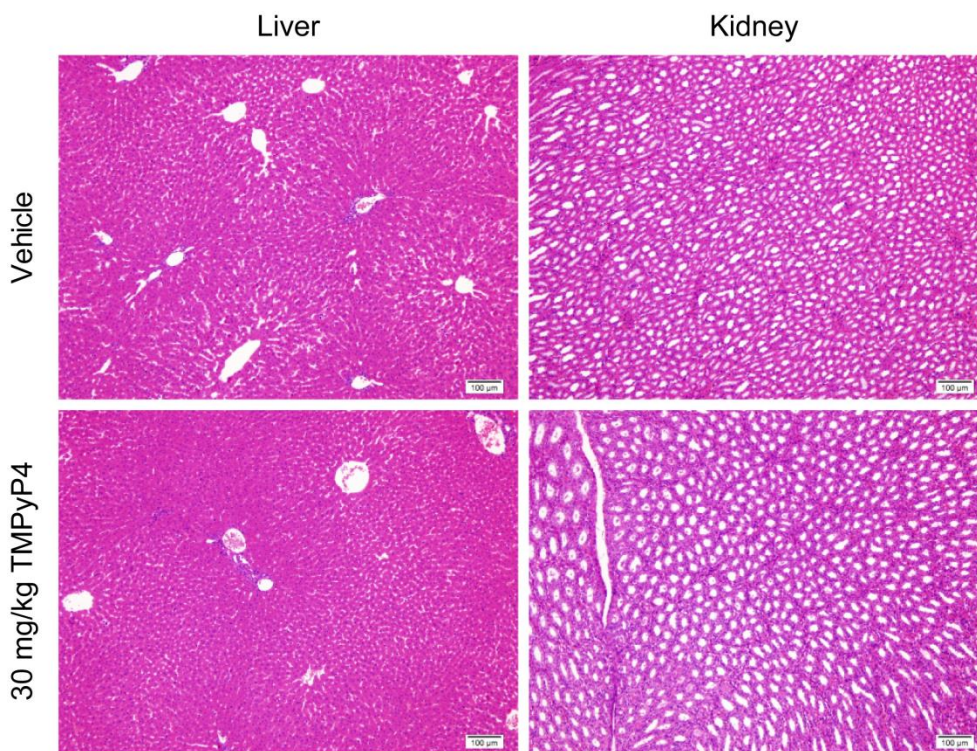

**Fig. S19** Intranasal administration of TMPyP4 (30 mg/kg) once daily for 7 consecutive days show no noticeable toxicity in the liver and kidney tissues of hamsters. Scale bar represents 100  $\mu$ m.

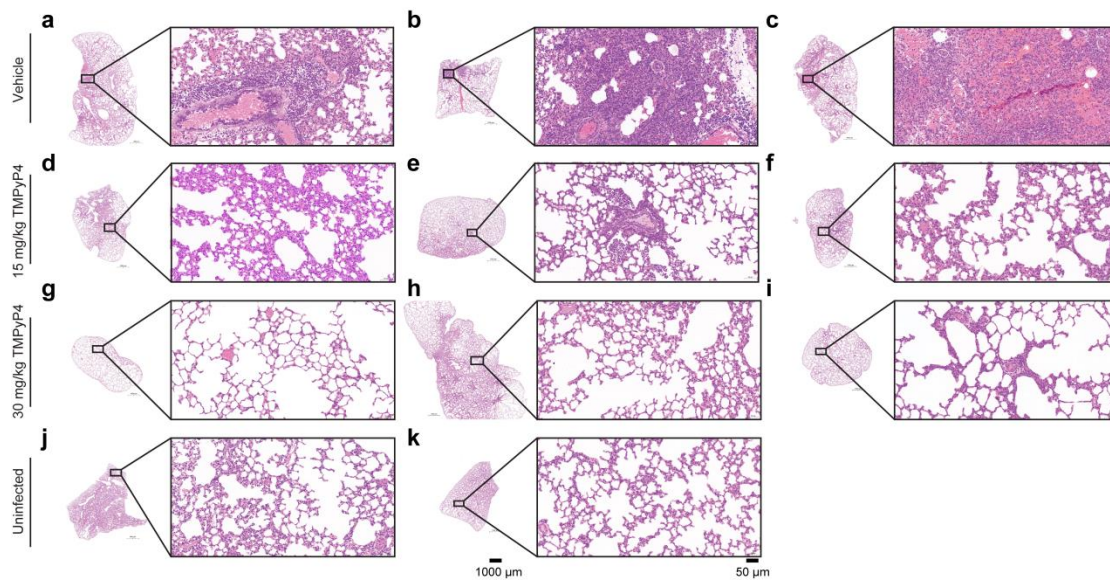

**Fig. S20 Scanning images of whole lung tissue sections. a-k** The whole lung slide scan images from SARS-CoV-2 ( $10^5$  TCID<sub>50</sub> virus/hamster)-infected ( $n = 3$ ) or uninfected ( $n = 2$ ) hamster on 3 days post infection. The corresponding higher-magnification images were shown. [Note: (c), (e), (g) and (k) correspond to the full images of the lung tissue sections of mice treated with vehicle, 15 mg/kg TMPyP4, 30 mg/kg TMPyP4 and uninfected shown in Fig. 6d, respectively].

**a**

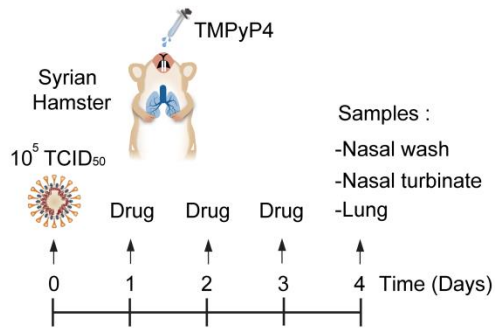

**b**

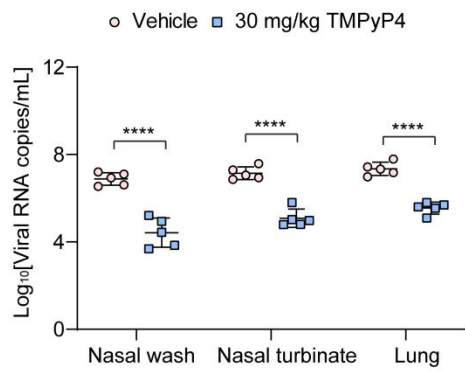

**c**

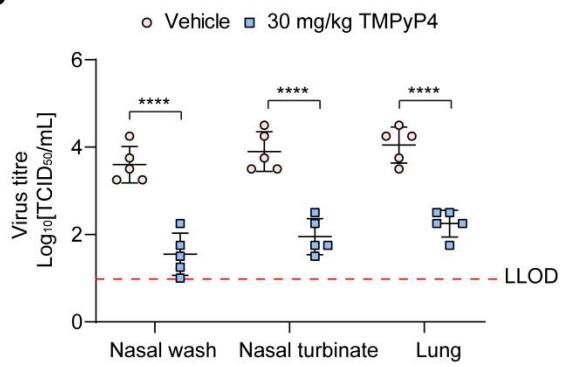

**d**

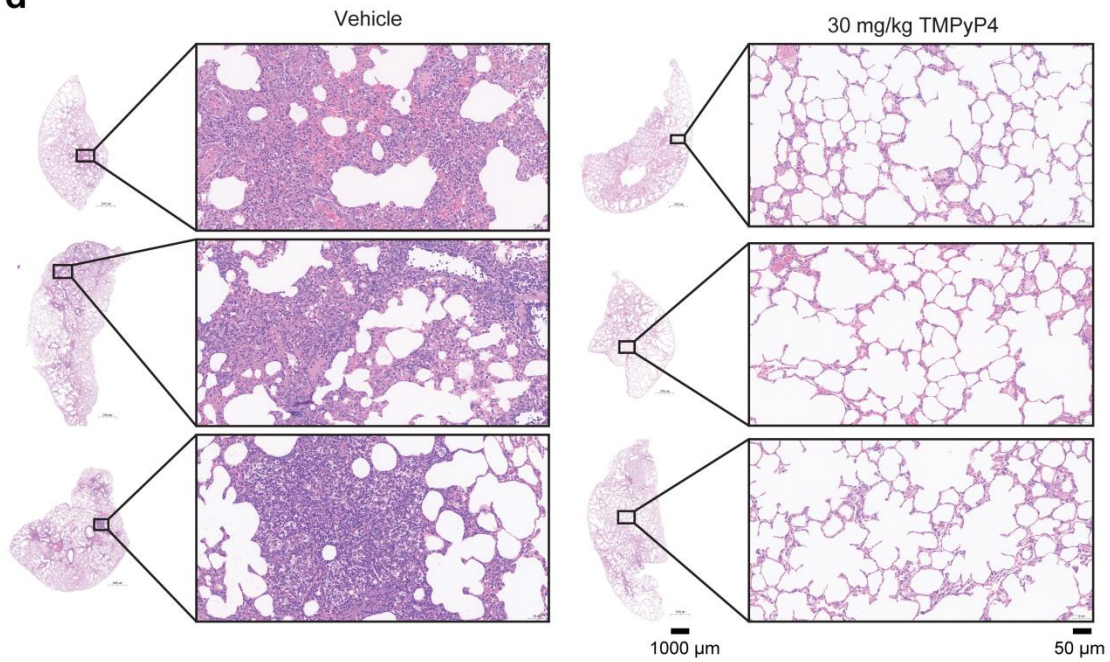

**Fig. S21 Antiviral activity of TMPyP4 in the hamster pre-infected with SARS-CoV-2.** **a** Schematic of SARS-CoV-2 infected hamster model. Hamsters infected with SARS-CoV-2 ( $10^5$  TCID<sub>50</sub> virus/hamster) were treated with vehicle ( $n = 5$ ) or 30 mg/kg ( $n = 5$ ) TMPyP4 for consecutive 3 days, with the first dose given at 24 h after infection with SARS-CoV-2. **b,c** Viral RNA copies (b) and viral titers (c) in the hamster nasal wash, nasal turbinate and lung tissues of the TMPyP4-treated groups relative to vehicle controls, determined by qRT-PCR and TCID<sub>50</sub> at day 3 after infection. LLOD for viral titers is indicated with a red dotted line. **d** The whole lung slide scan images from SARS-CoV-2 ( $10^5$  TCID<sub>50</sub> virus/hamster) pre-infected hamster ( $n = 3$ ) on 4 days post infection. The corresponding higher-magnification images were shown. Data are shown as mean  $\pm$  SEM, two-tailed Student's t test. \*\*\*\*  $P < 0.0001$ .

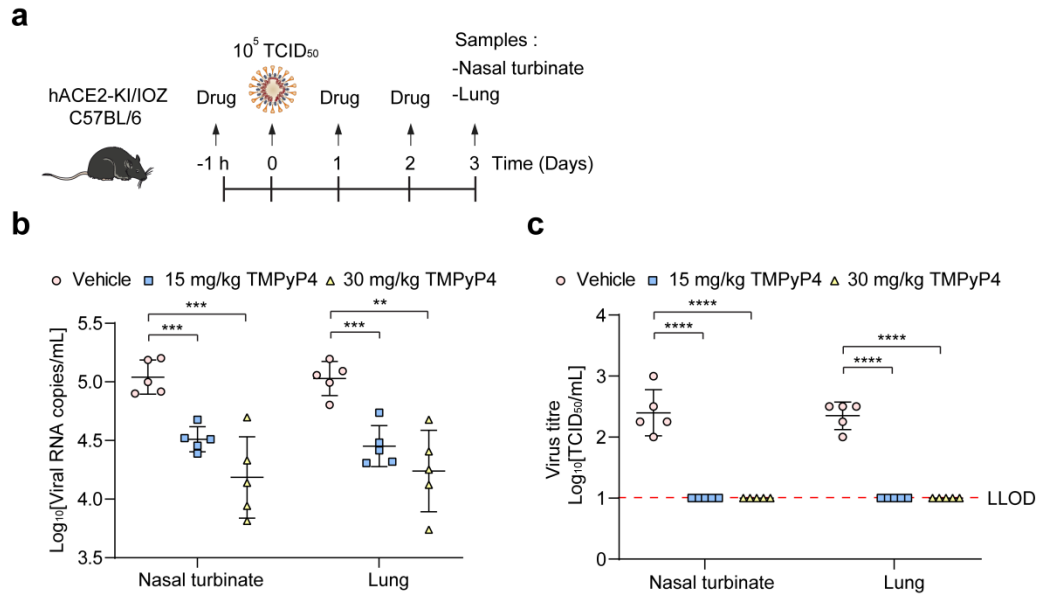

**Fig. S22 Antiviral activity of TMPyP4 in hACE2 transgenic mouse model of SARS-CoV-2 infection.** **a** Schematic of hACE2 transgenic mouse model of SARS-CoV-2 infection. Mice infected with SARS-CoV-2 ( $10^5$  TCID<sub>50</sub> virus/hamster) were treated with vehicle ( $n = 5$ ), 15 mg/kg ( $n = 5$ ) or 30 mg/kg ( $n = 5$ ) TMPyP4 for consecutive 3 days, with the first dose given at 1 h before infection with SARS-CoV-2. **b,c** Viral RNA copies (b) and viral titers (c) in the mice nasal turbinate and lung tissues of the TMPyP4-treated groups relative to vehicle controls, determined by qRT-PCR and TCID<sub>50</sub> at day 3 after infection. Lower limit of detection for viral titers is indicated with a red dotted line. Data are shown as mean  $\pm$  SEM, two-tailed Student's t test. \*\*  $P < 0.01$ , \*\*\*  $P < 0.001$ , \*\*\*\*  $P < 0.0001$ .



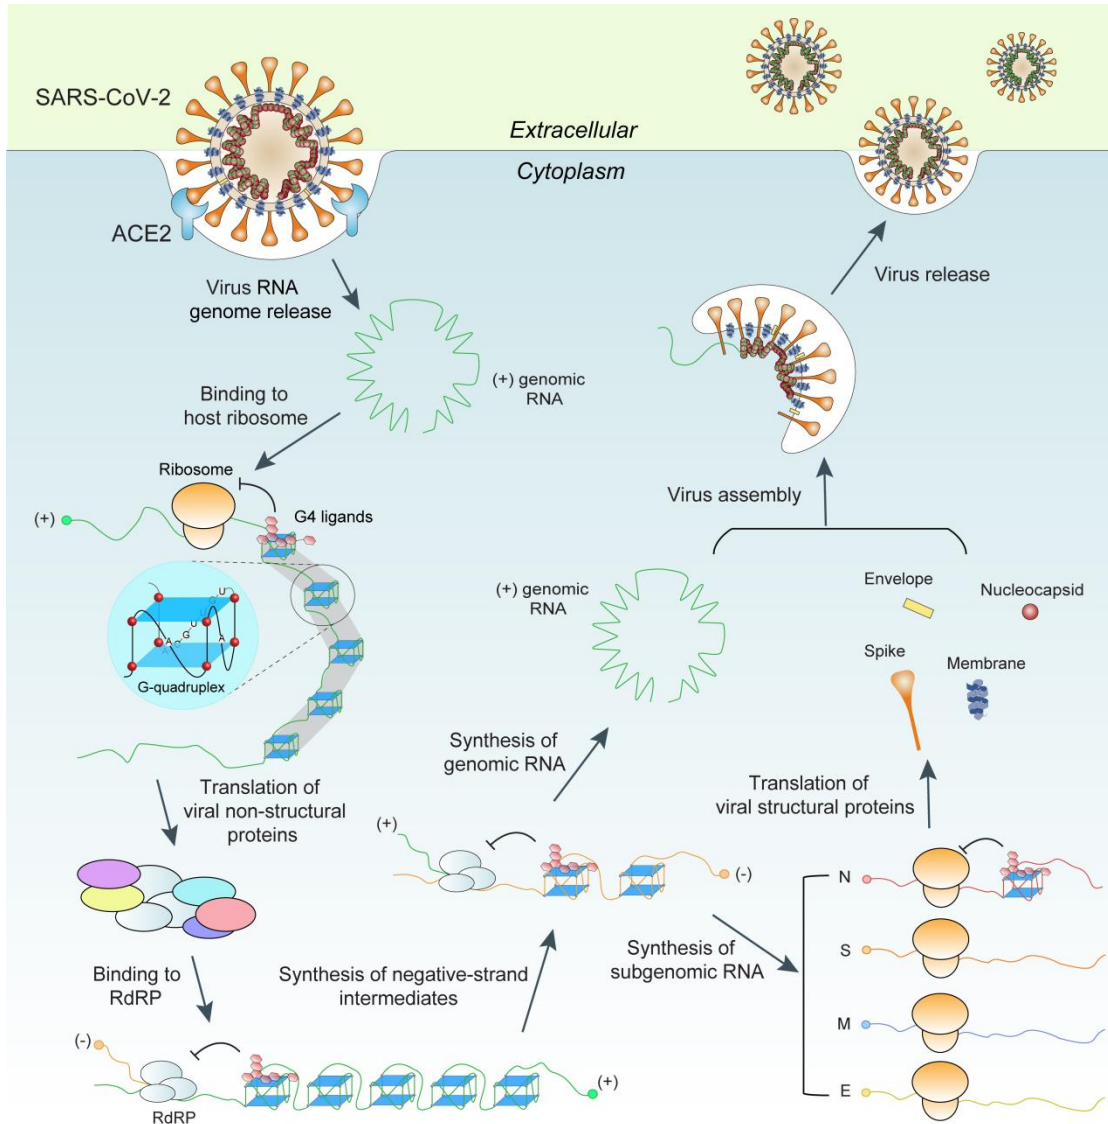

**Fig. S23 The regulatory mechanism of G4s in SARS-CoV-2 life cycle.** G4s act as inhibition elements in the SARS-CoV-2 life cycle and inhibit both the viral replication and translation processes by impairing the elongating of RdRp and ribosomes, leading to hinder the production of viral RNA and proteins. G4-specific ligands can bind and stabilize the G4s to enhance the inhibitory effects, which is a promising antiviral therapeutic strategy for COVID-19.
